# Supplementary material for: Transcriptome analysis of Phoenix canariensis Chabaud in response to Rhynchophorus ferrugineus Olivier attacks
Source: Front Plant Sci. 2015 Oct 14;6:817. doi: 10.3389/fpls.2015.00817 (PMC4604324; doi:10.3389/fpls.2015.00817)
Supplement: Supplementary file 4 [file Table4.XLSX]

## Sheet: Foglio1
Table S4. Differentially RPW-regulated genes at stage S2 involved in signal perception, signaling, hormone biosynthesis, stress-related pathways and transcription factors. Arabidopsis putative orthologs, annotation and fold ratio in the S2/He comparison are indicated.
Pathway	AGI	Annotation	Log2 Fold Ratio
hormone metabolism.abscisic acid.induced-regulated-responsive-activated	at5g13200.1	GRAM domain-containing protein / ABA-responsive protein-related | chr5:4207004-4208289 FORWARD	2187
hormone metabolism.abscisic acid.induced-regulated-responsive-activated	at5g08350.1	GRAM domain-containing protein / ABA-responsive protein-related | chr5:2686245-2687251 REVERSE	3253
hormone metabolism.abscisic acid.signal transduction	at5g20910.1	zinc finger (C3HC4-type RING finger) family protein | chr5:7092512-7094446 REVERSE	1598
hormone metabolism.abscisic acid.synthesis-degradation	at2g36020.1	Symbols: HVA22J | HVA22J (HVA22-LIKE PROTEIN J) | chr2:15123154-15125588 REVERSE	2446
hormone metabolism.abscisic acid.synthesis-degradation	at5g42560.1	abscisic acid-responsive HVA22 family protein | chr5:17014923-17017252 FORWARD	2613
hormone metabolism.abscisic acid.synthesis-degradation.synthesis.zeaxanthin epoxidase	at5g67030.1	Symbols: ABA1, LOS6, NPQ2, ATABA1, ZEP, IBS3, ATZEP | ABA1 (ABA DEFICIENT 1); zeaxanthin epoxidase | chr5:26753510-26757236 REVERSE	-1329
hormone metabolism.auxin.induced-regulated-responsive-activated	at2g34680.1	Symbols: AIR9 | AIR9; protein binding | chr2:14616622-14629129 REVERSE	-3108
hormone metabolism.auxin.induced-regulated-responsive-activated	at2g33310.2	Symbols: IAA13 | IAA13; transcription factor | chr2:14114281-14115969 REVERSE	-1942
hormone metabolism.auxin.induced-regulated-responsive-activated	at4g03400.1	Symbols: DFL2, GH3-10 | DFL2 (DWARF IN LIGHT 2) | chr4:1497536-1499865 REVERSE	-1469
hormone metabolism.auxin.induced-regulated-responsive-activated	at3g30300.1	FUNCTIONS IN: molecular_function unknown; INVOLVED IN: biological_process unknown; LOCATED IN: endomembrane system; EXPRESSED IN: 22 plant structures; EXPRESSED DURING: 13 growth stages; CONTAINS InterPro DOMAIN/s: Protein of unknown function DUF246, plant (InterPro:IPR004348); BEST Arabidopsis thaliana protein match is: EDA30 (embryo sac development arrest 30) (TAIR:AT3G03810.1); Has 512 Blast h…	-1042
hormone metabolism.auxin.induced-regulated-responsive-activated	at3g22850.1	unknown protein | chr3:8089003-8090470 FORWARD	1066
hormone metabolism.auxin.induced-regulated-responsive-activated	at4g27450.1	unknown protein | chr4:13727484-13728886 REVERSE	1407
hormone metabolism.auxin.induced-regulated-responsive-activated	at5g43830.1	unknown protein | chr5:17622336-17624329 REVERSE	1563
hormone metabolism.auxin.induced-regulated-responsive-activated	at5g42410.1	auxin-responsive family protein | chr5:16964764-16965099 FORWARD	2301
hormone metabolism.auxin.induced-regulated-responsive-activated	at1g60750.1	oxidoreductase | chr1:22362293-22363854 REVERSE	2568
hormone metabolism.auxin.induced-regulated-responsive-activated	at5g47530.1	auxin-responsive protein, putative | chr5:19281374-19283061 FORWARD	2932
hormone metabolism.auxin.induced-regulated-responsive-activated	at4g37390.1	Symbols: YDK1, GH3.2, BRU6, GH3-2, AUR3 | BRU6; indole-3-acetic acid amido synthetase | chr4:17579657-17582022 FORWARD	3273
hormone metabolism.auxin.induced-regulated-responsive-activated	at5g54510.1	Symbols: GH3.6, DFL1 | DFL1 (DWARF IN LIGHT 1); indole-3-acetic acid amido synthetase | chr5:22131093-22133678 REVERSE	6306
hormone metabolism.auxin.induced-regulated-responsive-activated	at2g46690.1	auxin-responsive family protein | chr2:19180730-19181467 FORWARD	2.06
hormone metabolism.auxin.induced-regulated-responsive-activated	at1g60690.1	aldo/keto reductase family protein | chr1:22349892-22351668 REVERSE	-3.33
hormone metabolism.auxin.signal transduction	at3g02260.1	Symbols: BIG, DOC1, TIR3, UMB1, ASA1, LPR1, CRM1 | BIG (BIG); binding / ubiquitin-protein ligase/ zinc ion binding | chr3:430984-448489 REVERSE	-2726
hormone metabolism.auxin.signal transduction	at1g73590.1	Symbols: PIN1, ATPIN1 | PIN1 (PIN-FORMED 1); transporter | chr1:27659673-27663178 FORWARD	-2317
hormone metabolism.auxin.signal transduction	at1g12820.1	Symbols: AFB3 | AFB3 (AUXIN SIGNALING F-BOX 3); auxin binding / ubiquitin-protein ligase | chr1:4368760-4371293 REVERSE	-1637
hormone metabolism.auxin.signal transduction	at3g62980.1	Symbols: TIR1 | TIR1 (TRANSPORT INHIBITOR RESPONSE 1); auxin binding / protein binding / ubiquitin-protein ligase | chr3:23273116-23276375 REVERSE	-1613
hormone metabolism.auxin.signal transduction	at5g57090.1	Symbols: EIR1, WAV6, ATPIN2, PIN2, AGR, AGR1 | EIR1 (ETHYLENE INSENSITIVE ROOT 1); auxin efflux transmembrane transporter/ auxin:hydrogen symporter/ transporter | chr5:23100693-23104735 FORWARD	4494
hormone metabolism.auxin.signal transduction	at2g01420.2	Symbols: PIN4 | PIN4 (PIN-FORMED 4); auxin:hydrogen symporter/ transporter | chr2:180105-183328 REVERSE	5425
hormone metabolism.auxin.synthesis-degradation	at1g05560.1	Symbols: UGT1, UGT75B1 | UGT75B1 (UDP-GLUCOSYLTRANSFERASE 75B1); UDP-glucose:4-aminobenzoate acylglucosyltransferase/ UDP-glucosyltransferase/ UDP-glycosyltransferase/ abscisic acid glucosyltransferase/ transferase, transferring glycosyl groups | chr1:1645498-1647147 REVERSE	1638
hormone metabolism.auxin.synthesis-degradation	at1g51760.1	Symbols: IAR3, JR3 | IAR3 (IAA-ALANINE RESISTANT 3); IAA-Ala conjugate hydrolase/ metallopeptidase | chr1:19199419-19201642 FORWARD	1715
hormone metabolism.brassinosteroid.signal transduction.BRI	at2g01950.1	Symbols: VH1, BRL2 | BRL2 (BRI1-LIKE 2); ATP binding / protein serine/threonine kinase/ transmembrane receptor protein serine/threonine kinase | chr2:440636-444276 REVERSE	-2655
hormone metabolism.brassinosteroid.signal transduction.BRI	at4g39400.1	Symbols: BRI1, CBB2, DWF2, BIN1, ATBRI1 | BRI1 (BRASSINOSTEROID INSENSITIVE 1); kinase/ protein binding / protein heterodimerization/ protein homodimerization/ protein kinase/ protein serine/threonine kinase | chr4:18324661-18328826 FORWARD	-2004
hormone metabolism.brassinosteroid.signal transduction.BRI	at1g74360.1	leucine-rich repeat transmembrane protein kinase, putative | chr1:27954231-27958114 FORWARD	1714
hormone metabolism.brassinosteroid.signal transduction.BZR	at1g78700.1	brassinosteroid signalling positive regulator-related | chr1:29599349-29601682 FORWARD	1364
hormone metabolism.brassinosteroid.synthesis-degradation.sterols.DWF1	at3g19820.1	Symbols: DWF1, DIM, EVE1, DIM1, CBB1 | DWF1 (DWARF 1); calmodulin binding / catalytic | chr3:6879617-6881652 REVERSE	-2743
hormone metabolism.brassinosteroid.synthesis-degradation.sterols.other	at1g58440.1	Symbols: XF1, SQE1 | XF1; squalene monooxygenase | chr1:21713842-21717290 REVERSE	5644
hormone metabolism.brassinosteroid.synthesis-degradation.sterols.SMT2	at5g13710.1	Symbols: SMT1, CPH | SMT1 (STEROL METHYLTRANSFERASE 1); sterol 24-C-methyltransferase | chr5:4423695-4427058 REVERSE	-1556
hormone metabolism.cytokinin.signal transduction	at5g35750.1	Symbols: AHK2 | AHK2 (ARABIDOPSIS HISTIDINE KINASE 2); cytokinin receptor/ osmosensor/ protein histidine kinase | chr5:13911371-13916337 REVERSE	-1657
hormone metabolism.cytokinin.signal transduction	at2g01830.2	Symbols: WOL, CRE1, WOL1, AHK4, ATCRE1 | WOL (WOODEN LEG); cytokinin receptor/ osmosensor/ phosphoprotein phosphatase/ protein histidine kinase | chr2:362983-368082 REVERSE	-1.36
hormone metabolism.ethylene.induced-regulated-responsive-activated	at1g55150.1	DEAD box RNA helicase, putative (RH20) | chr1:20574480-20577320 FORWARD	1235
hormone metabolism.ethylene.signal transduction	at3g04580.1	Symbols: EIN4 | EIN4 (ETHYLENE INSENSITIVE 4); ethylene binding / glycogen synthase kinase 3/ protein histidine kinase/ receptor | chr3:1235283-1238475 REVERSE	-1386
hormone metabolism.ethylene.synthesis-degradation	at5g59530.1	2-oxoglutarate-dependent dioxygenase, putative | chr5:23994170-23995734 REVERSE	1.23
hormone metabolism.ethylene.synthesis-degradation.1-aminocyclopropane-1-carboxylate oxidase	at1g05010.1	Symbols: EFE, ACO4, EAT1 | EFE (ETHYLENE-FORMING ENZYME); 1-aminocyclopropane-1-carboxylate oxidase | chr1:1431190-1432858 REVERSE	4932
hormone metabolism.ethylene.synthesis-degradation.1-aminocyclopropane-1-carboxylate oxidase	at1g77330.1	1-aminocyclopropane-1-carboxylate oxidase, putative / ACC oxidase, putative | chr1:29062990-29064537 REVERSE	5488
hormone metabolism.ethylene.synthesis-degradation.1-aminocyclopropane-1-carboxylate synthase	at4g26200.1	Symbols: ACS7, ATACS7 | ACS7; 1-aminocyclopropane-1-carboxylate synthase | chr4:13275307-13277188 FORWARD	3249
hormone metabolism.gibberelin.induced-regulated-responsive-activated	at1g14920.1	Symbols: GAI, RGA2 | GAI (GIBBERELLIC ACID INSENSITIVE); transcription factor | chr1:5149226-5151354 FORWARD	1184
hormone metabolism.gibberelin.synthesis-degradation.copalyl diphosphate synthase	at4g02780.1	Symbols: GA1, ABC33, ATCPS1 | GA1 (GA REQUIRING 1); ent-copalyl diphosphate synthase/ magnesium ion binding | chr4:1237767-1244813 REVERSE	2125
hormone metabolism.gibberelin.synthesis-degradation.ent-kaurene synthase	at1g79460.1	Symbols: GA2, KS, ATKS | GA2 (GA REQUIRING 2); ent-kaurene synthase | chr1:29890392-29894587 FORWARD	1694
hormone metabolism.gibberelin.synthesis-degradation.GA2 oxidase	at1g78440.1	Symbols: ATGA2OX1 | ATGA2OX1 (gibberellin 2-oxidase 1); gibberellin 2-beta-dioxygenase | chr1:29511599-29513051 REVERSE	-3433
hormone metabolism.gibberelin.synthesis-degradation.GA2 oxidase	at1g30040.1	Symbols: ATGA2OX2 | ATGA2OX2 (GIBBERELLIN 2-OXIDASE); gibberellin 2-beta-dioxygenase | chr1:10537648-10539831 FORWARD	3877
hormone metabolism.jasmonate.synthesis-degradation.12-Oxo-PDA-reductase	at1g76690.1	Symbols: OPR2, ATOPR2 | OPR2 | chr1:28778890-28780483 FORWARD	4731
hormone metabolism.jasmonate.synthesis-degradation.allene oxidase synthase	at5g42650.1	Symbols: AOS, CYP74A, DDE2 | AOS (ALLENE OXIDE SYNTHASE); allene oxide synthase/ hydro-lyase/ oxygen binding | chr5:17097595-17099395 REVERSE	1454
hormone metabolism.jasmonate.synthesis-degradation.lipoxygenase	at1g17420.1	Symbols: LOX3 | LOX3; electron carrier/ iron ion binding / lipoxygenase/ metal ion binding / oxidoreductase, acting on single donors with incorporation of molecular oxygen, incorporation of two atoms of oxygen | chr1:5977411-5981480 FORWARD	-2544
hormone metabolism.salicylic acid.synthesis-degradation	at1g05680.1	UDP-glucoronosyl/UDP-glucosyl transferase family protein | chr1:1703092-1704691 REVERSE	1541
hormone metabolism.salicylic acid.synthesis-degradation.synthesis.SA glucosyltransferase ester and ether bond making SGE, SAG	at2g43820.1	Symbols: GT, UGT74F2 | UGT74F2 (UDP-GLUCOSYLTRANSFERASE 74F2); UDP-glucose:4-aminobenzoate acylglucosyltransferase/ UDP-glucosyltransferase/ UDP-glycosyltransferase/ transferase, transferring glycosyl groups / transferase, transferring hexosyl groups | chr2:18152227-18153908 FORWARD	1922
RNA.regulation of transcription	at3g04740.1	Symbols: SWP, MED14, ATMED14 | SWP (STRUWWELPETER) | chr3:1293807-1300714 FORWARD	-1711
RNA.regulation of transcription	at1g55300.2	Symbols: TAF7 | TAF7 (TBP-ASSOCIATED FACTOR 7); general RNA polymerase II transcription factor | chr1:20628023-20629692 REVERSE	1.15
RNA.regulation of transcription.ABI3/VP1-related B3-domain-containing transcription factor family	at5g06250.2	transcription factor | chr5:1892714-1894124 REVERSE	4412
RNA.regulation of transcription.AP2/EREBP, APETALA2/Ethylene-responsive element binding protein family	at4g25490.1	Symbols: CBF1, DREB1B, ATCBF1 | CBF1 (C-REPEAT/DRE BINDING FACTOR 1); DNA binding / transcription activator/ transcription factor | chr4:13021780-13022725 REVERSE	-3062
RNA.regulation of transcription.AP2/EREBP, APETALA2/Ethylene-responsive element binding protein family	at2g28550.3	Symbols: RAP2.7, TOE1 | RAP2.7 (RELATED TO AP2.7); DNA binding / transcription factor | chr2:12225951-12228543 REVERSE	-1748
RNA.regulation of transcription.AP2/EREBP, APETALA2/Ethylene-responsive element binding protein family	at2g47520.1	AP2 domain-containing transcription factor, putative | chr2:19502802-19503569 REVERSE	-1608
RNA.regulation of transcription.AP2/EREBP, APETALA2/Ethylene-responsive element binding protein family	at1g12610.1	Symbols: DDF1 | DDF1 (DWARF AND DELAYED FLOWERING 1); DNA binding / sequence-specific DNA binding / transcription factor | chr1:4289944-4291017 REVERSE	-1522
RNA.regulation of transcription.AP2/EREBP, APETALA2/Ethylene-responsive element binding protein family	at2g40340.1	AP2 domain-containing transcription factor, putative (DRE2B) | chr2:16848438-16850487 REVERSE	1263
RNA.regulation of transcription.AP2/EREBP, APETALA2/Ethylene-responsive element binding protein family	at3g16770.1	Symbols: RAP2.3, ATEBP, ERF72 | ATEBP (ETHYLENE-RESPONSIVE ELEMENT BINDING PROTEIN); DNA binding / protein binding / transcription activator/ transcription factor | chr3:5705662-5707023 FORWARD	1328
RNA.regulation of transcription.AP2/EREBP, APETALA2/Ethylene-responsive element binding protein family	at1g53910.1	Symbols: RAP2.12 | RAP2.12; DNA binding / transcription factor | chr1:20135112-20136970 FORWARD	1619
RNA.regulation of transcription.AP2/EREBP, APETALA2/Ethylene-responsive element binding protein family	at1g50680.1	AP2 domain-containing transcription factor, putative | chr1:18777601-18778614 REVERSE	2609
RNA.regulation of transcription.AP2/EREBP, APETALA2/Ethylene-responsive element binding protein family	at5g19790.1	Symbols: RAP2.11 | RAP2.11 (related to AP2 11); DNA binding / transcription factor | chr5:6689108-6690040 REVERSE	2954
RNA.regulation of transcription.AP2/EREBP, APETALA2/Ethylene-responsive element binding protein family	at4g39780.1	AP2 domain-containing transcription factor, putative | chr4:18457957-18459180 REVERSE	3555
RNA.regulation of transcription.AP2/EREBP, APETALA2/Ethylene-responsive element binding protein family	at5g61890.1	AP2 domain-containing transcription factor family protein | chr5:24852639-24853910 REVERSE	4647
RNA.regulation of transcription.AP2/EREBP, APETALA2/Ethylene-responsive element binding protein family	at5g50080.1	Symbols: ERF110 | DNA binding / transcription factor | chr5:20365722-20366835 FORWARD	5294
RNA.regulation of transcription.ARF, Auxin Response Factor family	at2g46530.3	Symbols: ARF11 | ARF11 (AUXIN RESPONSE FACTOR 11); transcription factor | chr2:19105112-19108331 FORWARD	-2299
RNA.regulation of transcription.ARF, Auxin Response Factor family	at5g37020.1	Symbols: ARF8, ATARF8 | ARF8 (AUXIN RESPONSE FACTOR 8); transcription factor | chr5:14630028-14634387 FORWARD	-1563
RNA.regulation of transcription.ARF, Auxin Response Factor family	at4g23980.1	Symbols: ARF9 | ARF9 (AUXIN RESPONSE FACTOR 9); transcription factor | chr4:12451277-12455014 FORWARD	-1013
RNA.regulation of transcription.AS2,Lateral Organ Boundaries Gene Family	at2g40470.1	Symbols: LBD15 | LBD15 (LOB DOMAIN-CONTAINING PROTEIN 15) | chr2:16902304-16903652 REVERSE	4681
RNA.regulation of transcription.AS2,Lateral Organ Boundaries Gene Family	at1g07900.1	Symbols: LBD1 | LBD1 (LOB DOMAIN-CONTAINING PROTEIN 1) | chr1:2442622-2443632 FORWARD	5.68
RNA.regulation of transcription.AtSR Transcription Factor family	at5g64220.1	calmodulin-binding protein | chr5:25686246-25692215 FORWARD	-1034
RNA.regulation of transcription.Aux/IAA family	at2g33310.2	Symbols: IAA13 | IAA13; transcription factor | chr2:14114281-14115969 REVERSE	-1942
RNA.regulation of transcription.Aux/IAA family	at3g16500.1	Symbols: PAP1, IAA26 | PAP1 (PHYTOCHROME-ASSOCIATED PROTEIN 1); transcription factor | chr3:5612500-5614410 REVERSE	5.7
RNA.regulation of transcription.B3 transcription factor family	at4g31640.1	transcriptional factor B3 family protein | chr4:15328357-15329689 FORWARD	-1986
RNA.regulation of transcription.B3 transcription factor family	at4g33280.1	DNA binding / transcription factor | chr4:16047354-16049355 REVERSE	6383
RNA.regulation of transcription.bHLH,Basic Helix-Loop-Helix family	at1g01260.1	basic helix-loop-helix (bHLH) family protein | chr1:109032-111609 FORWARD	-2678
RNA.regulation of transcription.bHLH,Basic Helix-Loop-Helix family	at4g34530.1	Symbols: CIB1 | CIB1 (CRYPTOCHROME-INTERACTING BASIC-HELIX-LOOP-HELIX 1); DNA binding / transcription factor | chr4:16498391-16500174 FORWARD	-2252
RNA.regulation of transcription.bHLH,Basic Helix-Loop-Helix family	at5g57150.4	basic helix-loop-helix (bHLH) family protein | chr5:23152319-23155066 FORWARD	-2059
RNA.regulation of transcription.bHLH,Basic Helix-Loop-Helix family	at5g54680.1	Symbols: ILR3 | ILR3 (iaa-leucine resistant3); DNA binding / transcription factor | chr5:22217055-22219274 FORWARD	1069
RNA.regulation of transcription.bHLH,Basic Helix-Loop-Helix family	at4g02590.1	Symbols: UNE12 | UNE12 (unfertilized embryo sac 12); DNA binding / transcription factor | chr4:1137498-1140491 REVERSE	1301
RNA.regulation of transcription.bHLH,Basic Helix-Loop-Helix family	at1g69010.1	Symbols: BIM2 | BIM2 (BES1-interacting Myc-like protein 2); DNA binding / transcription factor | chr1:25941675-25943836 FORWARD	1539
RNA.regulation of transcription.bHLH,Basic Helix-Loop-Helix family	at2g27230.1	Symbols: LHW | LHW (LONESOME HIGHWAY); protein homodimerization/ transcription activator/ transcription factor | chr2:11650358-11654116 FORWARD	1642
RNA.regulation of transcription.bHLH,Basic Helix-Loop-Helix family	at5g41315.1	Symbols: GL3, MYC6.2 | GL3 (GLABROUS 3); protein binding / transcription factor | chr5:16529455-16532879 FORWARD	2215
RNA.regulation of transcription.bHLH,Basic Helix-Loop-Helix family	at4g37850.1	basic helix-loop-helix (bHLH) family protein | chr4:17796093-17797900 REVERSE	4562
RNA.regulation of transcription.Bromodomain proteins	at3g57980.1	DNA-binding bromodomain-containing protein | chr3:21466919-21469148 REVERSE	1435
RNA.regulation of transcription.bZIP transcription factor family	at1g27000.1	bZIP family transcription factor | chr1:9373926-9376720 FORWARD	1041
RNA.regulation of transcription.bZIP transcription factor family	at3g17609.2	Symbols: HYH | HYH (HY5-HOMOLOG); DNA binding / transcription factor | chr3:6023866-6024698 FORWARD	1155
RNA.regulation of transcription.bZIP transcription factor family	at5g28770.2	Symbols: BZO2H3 | BZO2H3; DNA binding / protein heterodimerization/ transcription factor | chr5:10796459-10798222 REVERSE	1168
RNA.regulation of transcription.bZIP transcription factor family	at2g36270.1	Symbols: ABI5, GIA1 | ABI5 (ABA INSENSITIVE 5); DNA binding / transcription activator/ transcription factor | chr2:15204764-15207528 REVERSE	1303
RNA.regulation of transcription.bZIP transcription factor family	at5g06839.3	bZIP family transcription factor | chr5:2120527-2126454 FORWARD	1376
RNA.regulation of transcription.bZIP transcription factor family	at1g06850.1	Symbols: AtbZIP52 | AtbZIP52 (Arabidopsis thaliana basic leucine zipper 52); DNA binding / transcription factor | chr1:2105048-2106749 FORWARD	1758
RNA.regulation of transcription.bZIP transcription factor family	at1g03970.1	Symbols: GBF4 | GBF4; DNA binding / sequence-specific DNA binding / transcription factor | chr1:1018100-1019247 FORWARD	1857
RNA.regulation of transcription.bZIP transcription factor family	at4g38900.1	bZIP protein | chr4:18139295-18141950 REVERSE	3103
RNA.regulation of transcription.bZIP transcription factor family	at1g08320.1	bZIP family transcription factor | chr1:2621904-2627848 REVERSE	1.86
RNA.regulation of transcription.C2C2(Zn) CO-like, Constans-like zinc finger family	at3g07650.1	Symbols: COL9 | COL9 (CONSTANS-LIKE 9); transcription factor/ zinc ion binding | chr3:2441657-2444532 FORWARD	-1211
RNA.regulation of transcription.C2C2(Zn) CO-like, Constans-like zinc finger family	at1g78600.2	Symbols: LZF1, STH3 | LZF1 (LIGHT-REGULATED ZINC FINGER PROTEIN 1); transcription factor/ zinc ion binding | chr1:29567187-29568859 FORWARD	1371
RNA.regulation of transcription.C2C2(Zn) CO-like, Constans-like zinc finger family	at4g27310.1	zinc finger (B-box type) family protein | chr4:13675638-13676910 FORWARD	2162
RNA.regulation of transcription.C2C2(Zn) DOF zinc finger family	at4g24060.1	Dof-type zinc finger domain-containing protein | chr4:12503782-12505646 FORWARD	2682
RNA.regulation of transcription.C2C2(Zn) DOF zinc finger family	at5g62940.1	Dof-type zinc finger domain-containing protein | chr5:25256919-25258681 REVERSE	2952
RNA.regulation of transcription.C2C2(Zn) GATA transcription factor family	at2g45050.1	zinc finger (GATA type) family protein | chr2:18582872-18584083 FORWARD	-1197
RNA.regulation of transcription.C2C2(Zn) GATA transcription factor family	at1g51600.1	Symbols: ZML2, TIFY2A | TIFY2A; sequence-specific DNA binding / transcription factor/ zinc ion binding | chr1:19132221-19135541 FORWARD	1391
RNA.regulation of transcription.C2H2 zinc finger family	at2g23740.2	nucleic acid binding / transcription factor/ zinc ion binding | chr2:10097559-10103398 FORWARD	-1648
RNA.regulation of transcription.C2H2 zinc finger family	at5g03510.1	zinc finger (C2H2 type) family protein | chr5:880225-881305 FORWARD	1286
RNA.regulation of transcription.C2H2 zinc finger family	at3g07940.1	zinc finger and C2 domain protein, putative | chr3:2529204-2531533 FORWARD	1569
RNA.regulation of transcription.C2H2 zinc finger family	at3g45260.1	zinc finger (C2H2 type) family protein | chr3:16596381-16598698 REVERSE	1615
RNA.regulation of transcription.C2H2 zinc finger family	at4g21160.1	Symbols: ZAC, AGD12 | ZAC; ARF GTPase activator/ phospholipid binding | chr4:11284147-11286767 FORWARD	2031
RNA.regulation of transcription.C2H2 zinc finger family	at5g04390.1	zinc finger (C2H2 type) family protein | chr5:1239100-1240517 FORWARD	2892
RNA.regulation of transcription.C2H2 zinc finger family	at1g43850.1	Symbols: SEU | SEU (seuss); DNA binding / protein binding / protein heterodimerization/ transcription cofactor | chr1:16617152-16622049 FORWARD	-1.64
RNA.regulation of transcription.C2H2 zinc finger family	at3g18290.1	Symbols: EMB2454 | EMB2454 (embryo defective 2454); protein binding / zinc ion binding | chr3:6273995-6280510 FORWARD	-1.81
RNA.regulation of transcription.C2H2 zinc finger family	at2g28710.1	zinc finger (C2H2 type) family protein | chr2:12322974-12323444 FORWARD	3.6
RNA.regulation of transcription.C3H zinc finger family	at5g43630.1	Symbols: TZP | TZP; DNA binding / nucleic acid binding / zinc ion binding | chr5:17526751-17530516 FORWARD	-1767
RNA.regulation of transcription.C3H zinc finger family	at4g38890.1	dihydrouridine synthase family protein | chr4:18135800-18139100 REVERSE	1214
RNA.regulation of transcription.C3H zinc finger family	at4g25440.1	Symbols: ZFWD1 | ZFWD1 (zinc finger WD40 repeat protein 1); nucleic acid binding / zinc ion binding | chr4:13006727-13009608 REVERSE	1396
RNA.regulation of transcription.CCAAT box binding factor family, DR1	at1g72440.1	Symbols: EDA25 | EDA25 (embryo sac development arrest 25) | chr1:27268165-27273596 REVERSE	-1313
RNA.regulation of transcription.CCAAT box binding factor family, DR1	at5g23090.2	Symbols: NF-YB13 | NF-YB13 (NUCLEAR FACTOR Y, SUBUNIT B13); transcription factor | chr5:7749070-7750544 FORWARD	1277
RNA.regulation of transcription.CCAAT box binding factor family, HAP2	at1g30500.2	Symbols: NF-YA7 | NF-YA7 (NUCLEAR FACTOR Y, SUBUNIT A7); specific transcriptional repressor/ transcription factor | chr1:10804450-10806319 REVERSE	1106
RNA.regulation of transcription.CCAAT box binding factor family, HAP5	at1g56170.1	Symbols: HAP5B, ATHAP5B, NF-YC2 | NF-YC2 (NUCLEAR FACTOR Y, SUBUNIT C2); DNA binding / transcription activator/ transcription factor | chr1:21024764-21025883 FORWARD	3653
RNA.regulation of transcription.Chromatin Remodeling Factors	at2g40770.1	ATP binding / DNA binding / helicase/ nucleic acid binding / protein binding / zinc ion binding | chr2:17013269-17021315 REVERSE	-2214
RNA.regulation of transcription.Chromatin Remodeling Factors	at2g46020.2	Symbols: CHR2, ATBRM, BRM, CHA2 | transcription regulatory protein SNF2, putative | chr2:18923304-18931934 FORWARD	-2185
RNA.regulation of transcription.Chromatin Remodeling Factors	at3g54280.2	Symbols: CHR16, CHA16, RGD3, ATBTAF1, BTAF1 | RGD3 (ROOT GROWTH DEFECTIVE 3); ATP binding / DNA binding / binding / helicase/ nucleic acid binding | chr3:20091976-20104155 FORWARD	-2055
RNA.regulation of transcription.Chromatin Remodeling Factors	at1g08600.3	Symbols: ATRX, CHR20 | ATRX; ATP binding / DNA binding / helicase/ nucleic acid binding | chr1:2724562-2733613 FORWARD	-1944
RNA.regulation of transcription.Chromatin Remodeling Factors	at5g22750.1	Symbols: RAD5 | RAD5; ATP binding / ATP-dependent helicase/ DNA binding / helicase/ hydrolase, acting on acid anhydrides, in phosphorus-containing anhydrides / nucleic acid binding / protein binding / zinc ion binding | chr5:7565037-7571083 REVERSE	-1184
RNA.regulation of transcription.Chromatin Remodeling Factors	at1g61140.1	Symbols: EDA16 | EDA16 (embryo sac development arrest 16); ATP binding / DNA binding / helicase/ nucleic acid binding / protein binding / zinc ion binding | chr1:22534717-22540850 REVERSE	-1.2
RNA.regulation of transcription.DNA methyltransferases	at4g19020.1	Symbols: CMT2 | CMT2 (chromomethylase 2); DNA binding / chromatin binding | chr4:10414526-10421209 FORWARD	-1779
RNA.regulation of transcription.DNA methyltransferases	at5g49160.1	Symbols: MET1, MET2, METI, DDM2, DMT01, DMT1 | MET1 (METHYLTRANSFERASE 1); methyltransferase | chr5:19932230-19938369 FORWARD	-1493
RNA.regulation of transcription.FHA transcription factor	at5g07400.1	forkhead-associated domain-containing protein / FHA domain-containing protein | chr5:2340642-2345458 FORWARD	-2146
RNA.regulation of transcription.G2-like transcription factor family, GARP	at4g17695.1	Symbols: KAN3 | KAN3 (KANADI 3); DNA binding / transcription factor | chr4:9848032-9850704 REVERSE	-2592
RNA.regulation of transcription.G2-like transcription factor family, GARP	at3g04030.3	myb family transcription factor | chr3:1042882-1044697 REVERSE	1092
RNA.regulation of transcription.G2-like transcription factor family, GARP	at3g46640.3	Symbols: PCL1, LUX | PCL1 (PHYTOCLOCK 1); DNA binding / transcription factor | chr3:17183090-17184464 FORWARD	1418
RNA.regulation of transcription.G2-like transcription factor family, GARP	at4g28610.1	Symbols: PHR1, AtPHR1 | PHR1 (PHOSPHATE STARVATION RESPONSE 1); transcription factor | chr4:14132856-14135259 REVERSE	1555
RNA.regulation of transcription.G2-like transcription factor family, GARP	at3g13040.1	myb family transcription factor | chr3:4172142-4175227 REVERSE	1919
RNA.regulation of transcription.G2-like transcription factor family, GARP	at2g40260.1	myb family transcription factor | chr2:16816818-16818473 REVERSE	2091
RNA.regulation of transcription.G2-like transcription factor family, GARP	at1g25550.1	myb family transcription factor | chr1:8976434-8978093 FORWARD	2792
RNA.regulation of transcription.GeBP like	at5g28040.1	transcription regulator | chr5:10037269-10039001 REVERSE	1216
RNA.regulation of transcription.GeBP like	at5g14280.1	DNA-binding storekeeper protein-related | chr5:4609123-4611444 FORWARD	1869
RNA.regulation of transcription.General Transcription	at2g22840.1	Symbols: AtGRF1 | AtGRF1 (GROWTH-REGULATING FACTOR 1); transcription activator | chr2:9728756-9731301 FORWARD	-2519
RNA.regulation of transcription.General Transcription	at4g37740.1	Symbols: AtGRF2 | AtGRF2 (GROWTHREGULATING FACTOR 2); transcription activator | chr4:17725337-17727730 REVERSE	-1747
RNA.regulation of transcription.General Transcription	at3g13960.1	Symbols: AtGRF5 | AtGRF5 (GROWTH-REGULATING FACTOR 5); transcription activator | chr3:4608383-4610399 FORWARD	-1077
RNA.regulation of transcription.General Transcription	at4g35540.1	transcription regulator/ zinc ion binding | chr4:16873835-16875598 FORWARD	1133
RNA.regulation of transcription.Global transcription factor group	at3g27260.1	Symbols: GTE8 | GTE8; DNA binding | chr3:10067638-10072661 FORWARD	-1474
RNA.regulation of transcription.HB,Homeobox transcription factor family	at1g69780.1	Symbols: ATHB13 | ATHB13; DNA binding / sequence-specific DNA binding / transcription factor | chr1:26258939-26260751 FORWARD	-2291
RNA.regulation of transcription.HB,Homeobox transcription factor family	at4g00730.1	Symbols: ANL2, AHDP | ANL2 (ANTHOCYANINLESS 2); transcription factor/ transcription regulator | chr4:299359-304508 REVERSE	-1309
RNA.regulation of transcription.HB,Homeobox transcription factor family	at4g36870.1	Symbols: BLH2, SAW1 | BLH2 (BEL1-LIKE HOMEODOMAIN 2); DNA binding / transcription factor | chr4:17369320-17373930 FORWARD	-1181
RNA.regulation of transcription.HB,Homeobox transcription factor family	at4g40060.1	Symbols: ATHB16, ATHB-16 | ATHB16 (ARABIDOPSIS THALIANA HOMEOBOX PROTEIN 16); sequence-specific DNA binding / transcription activator/ transcription factor | chr4:18571359-18573084 REVERSE	-1143
RNA.regulation of transcription.HB,Homeobox transcription factor family	at5g41410.1	Symbols: BEL1 | BEL1 (BELL 1); DNA binding / protein binding / transcription factor | chr5:16580044-16584008 FORWARD	-1045
RNA.regulation of transcription.HB,Homeobox transcription factor family	at5g25220.1	Symbols: KNAT3 | KNAT3 (KNOTTED1-LIKE HOMEOBOX GENE 3); transcription activator/ transcription factor | chr5:8736074-8738584 FORWARD	1318
RNA.regulation of transcription.HB,Homeobox transcription factor family	at3g01470.1	Symbols: ATHB-1, ATHB1, HD-ZIP-1, HAT5 | ATHB-1 (ARABIDOPSIS THALIANA HOMEOBOX 1); DNA binding / protein homodimerization/ sequence-specific DNA binding / transcription activator/ transcription factor | chr3:182396-184403 REVERSE	1944
RNA.regulation of transcription.HB,Homeobox transcription factor family	at4g35550.1	Symbols: HB-4, WOX13, ATWOX13 | WOX13 (WUSCHEL-RELATED HOMEOBOX 13); DNA binding / transcription factor | chr4:16875521-16877306 REVERSE	2585
RNA.regulation of transcription.HB,Homeobox transcription factor family	at3g61890.1	Symbols: ATHB-12, ATHB12 | ATHB-12 (ARABIDOPSIS THALIANA HOMEOBOX 12); transcription activator/ transcription factor | chr3:22914154-22915325 REVERSE	3214
RNA.regulation of transcription.HB,Homeobox transcription factor family	at2g23760.1	Symbols: BLH4, SAW2 | BLH4 (BEL1-LIKE HOMEODOMAIN 4); DNA binding / transcription factor | chr2:10107709-10112823 REVERSE	-1.19
RNA.regulation of transcription.HB,Homeobox transcription factor family	at1g62990.1	Symbols: KNAT7, IXR11 | KNAT7 (KNOTTED-LIKE HOMEOBOX OF ARABIDOPSIS THALIANA 7); DNA binding / transcription activator/ transcription factor | chr1:23337365-23340688 FORWARD	1.84
RNA.regulation of transcription.HB,Homeobox transcription factor family	at2g27990.1	Symbols: BLH8, PNF | BLH8 (BEL1-LIKE HOMEODOMAIN 8); DNA binding / transcription factor | chr2:11921433-11924698 REVERSE	1.85
RNA.regulation of transcription.HDA	at5g55760.1	Symbols: SRT1 | SRT1 (sirtuin 1); DNA binding / NAD or NADH binding / NAD-dependent histone deacetylase/ zinc ion binding | chr5:22567222-22570963 FORWARD	-1492
RNA.regulation of transcription.Histone acetyltransferases	at1g79000.2	Symbols: HAC1, PCAT2, ATHPCAT2 | HAC1 (HISTONE ACETYLTRANSFERASE OF THE CBP FAMILY 1); H3/H4 histone acetyltransferase/ histone acetyltransferase/ transcription cofactor | chr1:29716350-29724621 REVERSE	-1178
RNA.regulation of transcription.HSF,Heat-shock transcription factor family	at2g26150.1	Symbols: ATHSFA2, HSFA2 | ATHSFA2; DNA binding / transcription factor | chr2:11135682-11137396 FORWARD	-1757
RNA.regulation of transcription.HSF,Heat-shock transcription factor family	at3g22830.1	Symbols: AT-HSFA6B, HSFA6B | AT-HSFA6B; DNA binding / transcription factor | chr3:8078820-8081051 FORWARD	-1353
RNA.regulation of transcription.HSF,Heat-shock transcription factor family	at1g46264.1	Symbols: AT-HSFB4, HSFB4 | AT-HSFB4; DNA binding / transcription factor | chr1:17224842-17226280 FORWARD	1095
RNA.regulation of transcription.JUMONJI family	at4g20400.1	transcription factor jumonji (jmj) family protein / zinc finger (C5HC2 type) family protein | chr4:11008666-11013842 FORWARD	-1705
RNA.regulation of transcription.JUMONJI family	at3g48430.1	Symbols: REF6 | REF6 (RELATIVE OF EARLY FLOWERING 6); nucleic acid binding / transcription factor/ zinc ion binding | chr3:17935609-17940746 FORWARD	-1623
RNA.regulation of transcription.JUMONJI family	at1g11950.1	transcription factor | chr1:4034587-4038310 REVERSE	-1.59
RNA.regulation of transcription.MADS box transcription factor family	at2g45660.1	Symbols: AGL20, SOC1 | AGL20 (AGAMOUS-LIKE 20); transcription factor | chr2:18807538-18811047 REVERSE	1269
RNA.regulation of transcription.MADS box transcription factor family	at2g45650.1	Symbols: AGL6 | AGL6 (AGAMOUS-LIKE 6); DNA binding / transcription factor | chr2:18804350-18806522 FORWARD	3245
RNA.regulation of transcription.Methyl binding domain proteins	at3g01460.1	Symbols: MBD9, ATMBD9 | MBD9; DNA binding / methyl-CpG binding | chr3:173316-182454 FORWARD	-1743
RNA.regulation of transcription.MYB domain transcription factor family	at5g35550.1	Symbols: TT2, ATMYB123, MYB123, ATTT2 | TT2 (TRANSPARENT TESTA 2); DNA binding / transcription factor | chr5:13726743-13727860 FORWARD	-2767
RNA.regulation of transcription.MYB domain transcription factor family	at1g09540.1	Symbols: MYB61, ATMYB61 | MYB61 (MYB DOMAIN PROTEIN 61); DNA binding / transcription factor | chr1:3086159-3087912 FORWARD	-2746
RNA.regulation of transcription.MYB domain transcription factor family	at3g05380.2	Symbols: ALY2, ATALY2 | DNA binding / nucleic acid binding / transcription factor | chr3:1539582-1546396 FORWARD	-1871
RNA.regulation of transcription.MYB domain transcription factor family	at3g04030.3	myb family transcription factor | chr3:1042882-1044697 REVERSE	1092
RNA.regulation of transcription.MYB domain transcription factor family	at3g61250.1	Symbols: AtMYB17 | AtMYB17 (myb domain protein 17); DNA binding / transcription factor | chr3:22671002-22672738 FORWARD	1115
RNA.regulation of transcription.MYB domain transcription factor family	at1g07540.1	Symbols: TRFL2 | TRFL2 (TRF-LIKE 2); DNA binding | chr1:2318433-2321048 REVERSE	1157
RNA.regulation of transcription.MYB domain transcription factor family	at1g17950.1	Symbols: ATMYB52, BW52, MYB52 | MYB52 (MYB DOMAIN PROTEIN 52); DNA binding / transcription factor | chr1:6177617-6179289 FORWARD	1462
RNA.regulation of transcription.MYB domain transcription factor family	at1g69560.1	Symbols: MYB105, AtMYB105 | MYB105 (myb domain protein 105); DNA binding / transcription factor | chr1:26157755-26159094 FORWARD	1564
RNA.regulation of transcription.MYB domain transcription factor family	at3g09230.1	Symbols: AtMYB1 | AtMYB1 (myb domain protein 1); DNA binding / transcription factor | chr3:2833398-2835338 FORWARD	1894
RNA.regulation of transcription.MYB domain transcription factor family	at3g23250.1	Symbols: MYB15, ATY19, ATMYB15 | MYB15 (MYB DOMAIN PROTEIN 15); DNA binding / transcription factor | chr3:8309209-8310826 FORWARD	1929
RNA.regulation of transcription.MYB domain transcription factor family	at5g16770.1	Symbols: AtMYB9 | AtMYB9 (myb domain protein 9); DNA binding / transcription factor | chr5:5514884-5516936 FORWARD	2465
RNA.regulation of transcription.MYB domain transcription factor family	at3g49690.1	Symbols: RAX3, MYB84, ATMYB84 | MYB84 (MYB DOMAIN PROTEIN 84); DNA binding / transcription factor | chr3:18427735-18429201 FORWARD	2817
RNA.regulation of transcription.MYB domain transcription factor family	at4g38620.1	Symbols: ATMYB4, MYB4 | MYB4; DNA binding / transcription factor | chr4:18053551-18054999 FORWARD	2903
RNA.regulation of transcription.MYB domain transcription factor family	at1g68320.1	Symbols: MYB62, AtMYB62, BW62B, BW62C | MYB62 (myb domain protein 62); DNA binding / transcription factor | chr1:25603842-25605096 FORWARD	3247
RNA.regulation of transcription.MYB domain transcription factor family	at4g21440.1	Symbols: ATMYB102, ATM4 | ATMYB102 (ARABIDOPSIS MYB-LIKE 102); DNA binding / transcription factor | chr4:11418246-11419760 REVERSE	4281
RNA.regulation of transcription.MYB domain transcription factor family	at1g48000.1	Symbols: MYB112, AtMYB112 | MYB112 (myb domain protein 112); DNA binding / transcription factor | chr1:17704179-17706460 REVERSE	4391
RNA.regulation of transcription.MYB domain transcription factor family	at3g13540.1	Symbols: ATMYB5 | ATMYB5 (MYB DOMAIN PROTEIN 5); DNA binding / transcription factor | chr3:4420173-4421701 FORWARD	5486
RNA.regulation of transcription.MYB domain transcription factor family	at2g47460.1	Symbols: MYB12, ATMYB12, PFG1 | MYB12 (MYB DOMAIN PROTEIN 12); DNA binding / transcription activator/ transcription factor | chr2:19476337-19479478 FORWARD	2.77
RNA.regulation of transcription.MYB-related transcription factor family	at1g75250.1	Symbols: ATRL6 | ATRL6 (ARABIDOPSIS RAD-LIKE 6); transcription factor | chr1:28245073-28245453 REVERSE	-3718
RNA.regulation of transcription.MYB-related transcription factor family	at5g56840.1	DNA-binding family protein | chr5:22980693-22982342 FORWARD	-2649
RNA.regulation of transcription.MYB-related transcription factor family	at1g09770.1	Symbols: ATCDC5, CDC5, ATMYBCDC5 | ATCDC5 (ARABIDOPSIS THALIANA CELL DIVISION CYCLE 5); DNA binding / transcription factor | chr1:3161841-3165360 FORWARD	-1552
RNA.regulation of transcription.MYB-related transcription factor family	at3g16350.1	myb family transcription factor | chr3:5547718-5549660 FORWARD	1005
RNA.regulation of transcription.MYB-related transcription factor family	at5g08520.1	myb family transcription factor | chr5:2755175-2758362 REVERSE	1048
RNA.regulation of transcription.MYB-related transcription factor family	at5g47390.1	myb family transcription factor | chr5:19226790-19228858 FORWARD	3723
RNA.regulation of transcription.NAC domain transcription factor family	at3g13000.2	transcription factor | chr3:4157968-4162065 REVERSE	-1454
RNA.regulation of transcription.NAC domain transcription factor family	at3g04070.1	Symbols: anac047 | anac047 (Arabidopsis NAC domain containing protein 47); transcription factor | chr3:1061526-1063103 REVERSE	1976
RNA.regulation of transcription.NAC domain transcription factor family	at3g15510.1	Symbols: ATNAC2, ANAC056, NARS1 | ATNAC2 (ARABIDOPSIS NAC DOMAIN CONTAINING PROTEIN 2); transcription factor | chr3:5243510-5245382 FORWARD	2596
RNA.regulation of transcription.NAC domain transcription factor family	at3g15500.1	Symbols: ATNAC3, ANAC055 | ANAC055 (ARABIDOPSIS NAC DOMAIN CONTAINING PROTEIN 55); transcription factor | chr3:5234617-5236088 FORWARD	4301
RNA.regulation of transcription.NAC domain transcription factor family	at4g28530.1	Symbols: anac074 | anac074 (Arabidopsis NAC domain containing protein 74); transcription factor | chr4:14090489-14094776 REVERSE	4668
RNA.regulation of transcription.NAC domain transcription factor family	at1g56010.2	Symbols: NAC1, ANAC022 | NAC1; transcription factor | chr1:20946571-20949281 REVERSE	7.79
RNA.regulation of transcription.NIN-like bZIP-related family	at4g35270.1	RWP-RK domain-containing protein | chr4:16777338-16780824 REVERSE	-1231
RNA.regulation of transcription.Orphan family	at5g04560.2	Symbols: DME | DME (DEMETER); DNA N-glycosylase/ DNA-(apurinic or apyrimidinic site) lyase | chr5:1309202-1318401 FORWARD	-2728
RNA.regulation of transcription.PHD finger transcription factor	at3g14980.1	PHD finger transcription factor, putative | chr3:5039931-5045403 REVERSE	-1682
RNA.regulation of transcription.PHD finger transcription factor	at4g14920.1	DNA binding / protein binding / zinc ion binding | chr4:8531043-8535842 REVERSE	-1.56
RNA.regulation of transcription.PHD finger transcription factor	at5g58610.1	PHD finger transcription factor, putative | chr5:23686771-23691053 REVERSE	-4.15
RNA.regulation of transcription.PHOR1	at2g35930.1	Symbols: PUB23 | PUB23 (PLANT U-BOX 23); ubiquitin-protein ligase | chr2:15082855-15084473 REVERSE	3184
RNA.regulation of transcription.Polycomb Group (PcG)	at5g65910.1	BSD domain-containing protein | chr5:26361440-26363460 REVERSE	1059
RNA.regulation of transcription.putative transcription regulator	at1g02080.1	transcriptional regulator-related | chr1:373501-386847 FORWARD	-3018
RNA.regulation of transcription.putative transcription regulator	at5g55390.1	Symbols: EDM2 | EDM2; transcription factor | chr5:22447966-22454414 REVERSE	-1894
RNA.regulation of transcription.putative transcription regulator	at3g24870.1	DNA binding | chr3:9074665-9084278 REVERSE	-1816
RNA.regulation of transcription.putative transcription regulator	at1g23230.1	unknown protein | chr1:8244440-8251741 FORWARD	-1521
RNA.regulation of transcription.putative transcription regulator	at5g43500.1	Symbols: ATARP9 | ATARP9 (ACTIN-RELATED PROTEIN 9); protein binding | chr5:17469675-17473591 FORWARD	-1408
RNA.regulation of transcription.putative transcription regulator	at1g77800.1	PHD finger family protein | chr1:29253396-29260617 FORWARD	-1402
RNA.regulation of transcription.putative transcription regulator	at5g18230.2	transcription regulator NOT2/NOT3/NOT5 family protein | chr5:6021444-6027249 REVERSE	-1395
RNA.regulation of transcription.putative transcription regulator	at5g10940.1	transducin family protein / WD-40 repeat family protein | chr5:3448636-3454231 REVERSE	-1348
RNA.regulation of transcription.putative transcription regulator	at2g26780.1	binding | chr2:11410076-11423776 FORWARD	-1131
RNA.regulation of transcription.putative transcription regulator	at5g22760.1	PHD finger family protein | chr5:7571635-7577866 FORWARD	-1014
RNA.regulation of transcription.putative transcription regulator	at1g80270.1	DNA-binding protein, putative | chr1:30180988-30183507 FORWARD	-1002
RNA.regulation of transcription.putative transcription regulator	at5g05140.1	transcription elongation factor-related | chr5:1519913-1522667 FORWARD	1404
RNA.regulation of transcription.putative transcription regulator	at2g33620.1	DNA-binding family protein / AT-hook protein 1 (AHP1) | chr2:14234220-14236883 FORWARD	1472
RNA.regulation of transcription.putative transcription regulator	at1g68580.2	agenet domain-containing protein / bromo-adjacent homology (BAH) domain-containing protein | chr1:25752735-25756076 FORWARD	1927
RNA.regulation of transcription.putative transcription regulator	at1g67370.1	Symbols: ASY1, ATASY1 | ASY1 (ASYNAPTIC 1); DNA binding | chr1:25239117-25243837 REVERSE	2674
RNA.regulation of transcription.putative transcription regulator	at4g02560.1	Symbols: LD | LD (luminidependens); transcription factor | chr4:1123490-1128421 REVERSE	-1.04
RNA.regulation of transcription.putative transcription regulator	at2g29570.1	Symbols: PCNA2, ATPCNA2 | PCNA2 (PROLIFERATING CELL NUCLEAR ANTIGEN 2); DNA binding / DNA polymerase processivity factor | chr2:12649906-12651703 REVERSE	1.3
RNA.regulation of transcription.putative transcription regulator	at3g17450.1	hAT dimerisation domain-containing protein | chr3:5972671-5976118 REVERSE	-1.48
RNA.regulation of transcription.putative transcription regulator	at1g59453.1	transcription factor-related | chr1:21846902-21853384 REVERSE	-2.03
RNA.regulation of transcription.PWWP domain protein	at5g27650.1	PWWP domain-containing protein | chr5:9785407-9789232 FORWARD	1056
RNA.regulation of transcription.PWWP domain protein	at5g40340.1	PWWP domain-containing protein | chr5:16131654-16134916 REVERSE	-1.36
RNA.regulation of transcription.SET-domain transcriptional regulator family	at4g15180.1	Symbols: SDG2, ATXR3 | SDG2 (SET DOMAIN-CONTAINING PROTEIN 2) | chr4:8651406-8662587 FORWARD	-1733
RNA.regulation of transcription.SET-domain transcriptional regulator family	at1g77300.1	Symbols: EFS, SDG8, CCR1 | EFS (EARLY FLOWERING IN SHORT DAYS); histone methyltransferase(H3-K36 specific) / histone methyltransferase(H3-K4 specific) | chr1:29039922-29048810 REVERSE	-1578
RNA.regulation of transcription.SET-domain transcriptional regulator family	at5g13960.1	Symbols: SUVH4, KYP, SDG33 | SUVH4 (SU(VAR)3-9 HOMOLOG 4); double-stranded methylated DNA binding / histone methyltransferase(H3-K9 specific) / methyl-CpG binding / methyl-CpNpG binding / methyl-CpNpN binding | chr5:4501447-4506188 FORWARD	-1541
RNA.regulation of transcription.SET-domain transcriptional regulator family	at3g07670.1	SET domain-containing protein | chr3:2451608-2454860 FORWARD	-1062
RNA.regulation of transcription.SNF7	at2g19830.1	Symbols: SNF7.2, VPS32 | SNF7.2 | chr2:8557729-8559741 REVERSE	1.19
RNA.regulation of transcription.Transcriptional Adaptor Zinc Bundle (TAZ) domain family	at5g67480.2	Symbols: BT4 | BT4 (BTB AND TAZ DOMAIN PROTEIN 4); protein binding / transcription regulator | chr5:26930940-26932756 REVERSE	1718
RNA.regulation of transcription.Trihelix, Triple-Helix transcription factor family	at3g54390.1	transcription factor | chr3:20137741-20139142 REVERSE	-1144
RNA.regulation of transcription.Trihelix, Triple-Helix transcription factor family	at5g14540.1	proline-rich family protein | chr5:4687147-4689674 REVERSE	1949
RNA.regulation of transcription.unclassified	at1g30320.1	remorin family protein | chr1:10680246-10682954 FORWARD	-1835
RNA.regulation of transcription.unclassified	at4g23540.1	binding | chr4:12280413-12286420 REVERSE	-1732
RNA.regulation of transcription.unclassified	at5g59710.1	Symbols: VIP2, AtVIP2 | VIP2 (VIRE2 INTERACTING PROTEIN2); protein binding / transcription regulator | chr5:24057407-24061918 FORWARD	-1671
RNA.regulation of transcription.unclassified	at1g45207.2	remorin family protein | chr1:17130351-17133548 REVERSE	-1649
RNA.regulation of transcription.unclassified	at3g02320.1	RNA binding / tRNA (guanine-N2-)-methyltransferase | chr3:469934-473717 FORWARD	-1584
RNA.regulation of transcription.unclassified	at1g78930.1	mitochondrial transcription termination factor-related / mTERF-related | chr1:29678097-29680757 REVERSE	-1259
RNA.regulation of transcription.unclassified	at3g21480.1	FUNCTIONS IN: molecular_function unknown; INVOLVED IN: biological_process unknown; LOCATED IN: intracellular; CONTAINS InterPro DOMAIN/s: BRCT (InterPro:IPR001357); BEST Arabidopsis thaliana protein match is: transcription coactivator (TAIR:AT4G03130.1); Has 489 Blast hits to 455 proteins in 115 species: Archae - 2; Bacteria - 37; Metazoa - 270; Fungi - 30; Plants - 45; Viruses - 0; Other Eukaryo…	-1113
RNA.regulation of transcription.unclassified	at2g44020.1	mitochondrial transcription termination factor-related / mTERF-related | chr2:18217559-18219385 REVERSE	-1008
RNA.regulation of transcription.unclassified	at5g43100.1	aspartyl protease family protein | chr5:17299123-17303058 FORWARD	1043
RNA.regulation of transcription.unclassified	at1g33420.1	PHD finger family protein | chr1:12120886-12123576 REVERSE	1046
RNA.regulation of transcription.unclassified	at5g27280.1	zinc finger (DNL type) family protein | chr5:9617486-9618481 FORWARD	1051
RNA.regulation of transcription.unclassified	at5g13240.1	transcription regulator | chr5:4225005-4227613 REVERSE	1093
RNA.regulation of transcription.unclassified	at1g29800.1	phosphoinositide binding / zinc ion binding | chr1:10432601-10435441 FORWARD	1106
RNA.regulation of transcription.unclassified	at3g53710.1	Symbols: AGD6 | AGD6; ARF GTPase activator/ DNA binding / zinc ion binding | chr3:19903313-19905489 REVERSE	1107
RNA.regulation of transcription.unclassified	at2g20280.1	zinc finger (CCCH-type) family protein | chr2:8739911-8742349 REVERSE	1172
RNA.regulation of transcription.unclassified	at2g15910.1	CSL zinc finger domain-containing protein | chr2:6932406-6935333 REVERSE	1208
RNA.regulation of transcription.unclassified	at3g48940.1	remorin family protein | chr3:18142863-18144163 REVERSE	1284
RNA.regulation of transcription.unclassified	at2g41835.1	zinc finger (C2H2 type, AN1-like) family protein | chr2:17457786-17459568 REVERSE	1354
RNA.regulation of transcription.unclassified	at5g37055.1	Symbols: ATSWC6, SEF | SEF (SERRATED LEAVES AND EARLY FLOWERING) | chr5:14641551-14642440 REVERSE	1502
RNA.regulation of transcription.unclassified	at4g21790.1	Symbols: TOM1, ATTOM1 | TOM1 (TOBAMOVIRUS MULTIPLICATION 1); protein binding | chr4:11569765-11572549 FORWARD	1524
RNA.regulation of transcription.unclassified	at1g21000.1	zinc-binding family protein | chr1:7337728-7339452 FORWARD	1537
RNA.regulation of transcription.unclassified	at5g54310.1	Symbols: AGD5 | AGD5 (ARF-GAP domain 5); ARF GTPase activator/ DNA binding / zinc ion binding | chr5:22057052-22061270 REVERSE	1725
RNA.regulation of transcription.unclassified	at4g12040.1	zinc finger (AN1-like) family protein | chr4:7214703-7215989 FORWARD	1959
RNA.regulation of transcription.unclassified	at5g59730.1	Symbols: ATEXO70H7 | ATEXO70H7 (EXOCYST SUBUNIT EXO70 FAMILY PROTEIN H7); protein binding | chr5:24063877-24066170 REVERSE	2022
RNA.regulation of transcription.unclassified	at1g32700.1	zinc-binding family protein | chr1:11827433-11829759 FORWARD	2402
RNA.regulation of transcription.unclassified	at5g10770.1	chloroplast nucleoid DNA-binding protein, putative | chr5:3403110-3405448 REVERSE	3613
RNA.regulation of transcription.unclassified	at2g02170.1	remorin family protein | chr2:556493-558798 REVERSE	3982
RNA.regulation of transcription.unclassified	at5g06250.2	transcription factor | chr5:1892714-1894124 REVERSE	4412
RNA.regulation of transcription.unclassified	at5g19420.2	Ran GTPase binding / chromatin binding / zinc ion binding | chr5:6547638-6553242 REVERSE	-1.19
RNA.regulation of transcription.unclassified	at1g43850.1	Symbols: SEU | SEU (seuss); DNA binding / protein binding / protein heterodimerization/ transcription cofactor | chr1:16617152-16622049 FORWARD	-1.64
RNA.regulation of transcription.WRKY domain transcription factor family	at5g56270.1	Symbols: WRKY2, ATWRKY2 | WRKY2; transcription factor | chr5:22779693-22783268 FORWARD	-1492
RNA.regulation of transcription.WRKY domain transcription factor family	at4g01720.1	Symbols: WRKY47, AtWRKY47 | WRKY47; transcription factor | chr4:744921-748554 FORWARD	1513
RNA.regulation of transcription.WRKY domain transcription factor family	at1g68150.1	Symbols: WRKY9, ATWRKY9 | WRKY9; transcription factor | chr1:25543969-25545717 FORWARD	2233
RNA.regulation of transcription.WRKY domain transcription factor family	at1g30650.1	Symbols: WRKY14, ATWRKY14, AR411 | WRKY14; transcription factor | chr1:10868303-10871297 FORWARD	2453
RNA.regulation of transcription.WRKY domain transcription factor family	at1g80840.1	Symbols: WRKY40, ATWRKY40 | WRKY40; transcription factor | chr1:30383691-30385499 FORWARD	2684
RNA.regulation of transcription.WRKY domain transcription factor family	at5g15130.1	Symbols: WRKY72, ATWRKY72 | WRKY72; transcription factor | chr5:4904347-4907094 FORWARD	3549
RNA.regulation of transcription.WRKY domain transcription factor family	at4g18170.1	Symbols: WRKY28, ATWRKY28 | WRKY28; transcription factor | chr4:10061373-10062841 FORWARD	3992
RNA.regulation of transcription.WRKY domain transcription factor family	at5g64810.1	Symbols: WRKY51, ATWRKY51 | WRKY51; transcription factor | chr5:25908413-25909803 FORWARD	7754
RNA.regulation of transcription.WRKY domain transcription factor family	at5g13080.1	Symbols: WRKY75, ATWRKY75 | WRKY75; transcription factor | chr5:4149740-4151150 REVERSE	1.68
RNA.regulation of transcription.Zn-finger(CCHC)	at5g61780.1	tudor domain-containing protein / nuclease family protein | chr5:24821258-24826969 FORWARD	-1752
signalling.14-3-3 proteins	at1g78300.1	Symbols: GRF2, 14-3-3OMEGA, GF14 OMEGA | GRF2 (GENERAL REGULATORY FACTOR 2); protein binding / protein phosphorylated amino acid binding | chr1:29461671-29463385 FORWARD	1.57
signalling.calcium	at1g27460.1	Symbols: NPGR1 | NPGR1 (NO POLLEN GERMINATION RELATED 1); calmodulin binding | chr1:9534532-9537561 FORWARD	-2239
signalling.calcium	at2g24300.2	calmodulin-binding protein | chr2:10340908-10343736 FORWARD	-1998
signalling.calcium	at5g57010.1	calmodulin-binding family protein | chr5:23068037-23070412 FORWARD	-1958
signalling.calcium	at2g38800.1	calmodulin-binding protein-related | chr2:16216999-16219159 FORWARD	-1905
signalling.calcium	at1g74690.1	Symbols: IQD31 | IQD31 (IQ-domain 31); calmodulin binding | chr1:28061159-28064625 REVERSE	-1624
signalling.calcium	at1g19870.1	Symbols: iqd32 | iqd32 (IQ-domain 32); calmodulin binding | chr1:6895015-6898725 REVERSE	-1488
signalling.calcium	at2g38910.1	Symbols: CPK20 | CPK20; ATP binding / calcium ion binding / calmodulin-dependent protein kinase/ kinase/ protein kinase/ protein serine/threonine kinase | chr2:16245214-16247483 REVERSE	-1464
signalling.calcium	at1g21630.2	calcium-binding EF hand family protein | chr1:7581152-7588151 FORWARD	-1267
signalling.calcium	at5g04870.1	Symbols: CPK1, ATCPK1 | CPK1 (CALCIUM DEPENDENT PROTEIN KINASE 1); calmodulin-dependent protein kinase/ kinase | chr5:1416783-1420338 REVERSE	-1209
signalling.calcium	at1g20760.1	calcium-binding EF hand family protein | chr1:7209369-7214993 FORWARD	-1121
signalling.calcium	at1g09210.1	calreticulin 2 (CRT2) | chr1:2972842-2976750 REVERSE	1065
signalling.calcium	at5g37770.1	Symbols: TCH2, CML24 | TCH2 (TOUCH 2); calcium ion binding | chr5:14998854-14999619 REVERSE	1108
signalling.calcium	at4g37640.1	Symbols: ACA2 | ACA2 (CALCIUM ATPASE 2); calcium ion transmembrane transporter/ calcium-transporting ATPase/ calmodulin binding | chr4:17682977-17686941 REVERSE	1235
signalling.calcium	at4g17615.1	Symbols: CBL1, ATCBL1, SCABP5 | CBL1 (CALCINEURIN B-LIKE PROTEIN 1); calcium ion binding | chr4:9816452-9819312 FORWARD	1256
signalling.calcium	at1g05150.1	calcium-binding EF hand family protein | chr1:1484067-1486960 REVERSE	1317
signalling.calcium	at3g59690.1	Symbols: IQD13 | IQD13 (IQ-domain 13); calmodulin binding | chr3:22048754-22051673 FORWARD	1352
signalling.calcium	at5g19450.1	Symbols: CDPK19, CPK8 | CDPK19 (CALCIUM-DEPENDENT PROTEIN KINASE 19); ATP binding / calcium ion binding / calmodulin-dependent protein kinase/ kinase/ protein kinase/ protein serine/threonine kinase | chr5:6558426-6561534 REVERSE	1373
signalling.calcium	at3g18430.1	calcium-binding EF hand family protein | chr3:6325915-6327632 FORWARD	1412
signalling.calcium	at3g57330.1	Symbols: ACA11 | ACA11 (autoinhibited Ca2+-ATPase 11); calcium-transporting ATPase/ calmodulin binding | chr3:21211456-21216375 REVERSE	1464
signalling.calcium	at2g44310.1	calcium-binding EF hand family protein | chr2:18309212-18309826 FORWARD	1609
signalling.calcium	at5g24430.1	calcium-dependent protein kinase, putative / CDPK, putative | chr5:8339144-8343102 REVERSE	2073
signalling.calcium	at5g11100.1	Symbols: SYTD, ATSYTD, NTMC2TYPE2.2, NTMC2T2.2 | SYTD | chr5:3532402-3535221 FORWARD	2077
signalling.calcium	at1g24620.1	polcalcin, putative / calcium-binding pollen allergen, putative | chr1:8723712-8724459 REVERSE	2183
signalling.calcium	at3g03000.1	calmodulin, putative | chr3:677240-678084 FORWARD	2305
signalling.calcium	at1g76650.1	Symbols: CML38 | calcium-binding EF hand family protein | chr1:28766750-28767517 REVERSE	2436
signalling.calcium	at3g43810.1	Symbols: CAM7 | CAM7 (CALMODULIN 7); calcium ion binding | chr3:15664371-15666460 REVERSE	2841
signalling.calcium	at3g07490.1	Symbols: AGD11 | AGD11 (ARF-GAP domain 11); calcium ion binding | chr3:2391189-2391650 FORWARD	2991
signalling.calcium	at3g50770.1	calmodulin-related protein, putative | chr3:18873958-18874780 FORWARD	3072
signalling.calcium	at4g38810.2	calcium-binding EF hand family protein | chr4:18115283-18119077 REVERSE	4658
signalling.calcium	at2g15760.1	calmodulin-binding protein | chr2:6865610-6866877 REVERSE	7705
signalling.calcium	at5g39380.1	calmodulin-binding protein-related | chr5:15758717-15760686 REVERSE	1.28
signalling.calcium	at4g33000.1	Symbols: CBL10, ATCBL10 | CBL10 (CALCINEURIN B-LIKE 10); calcium ion binding | chr4:15924349-15926628 FORWARD	1.46
signalling.calcium	at5g24270.1	Symbols: SOS3, CBL4 | SOS3 (SALT OVERLY SENSITIVE 3); calcium ion binding / calcium-dependent protein serine/threonine phosphatase | chr5:8238781-8240366 REVERSE	1.69
signalling.calcium	at3g22910.1	calcium-transporting ATPase, plasma membrane-type, putative / Ca(2+)-ATPase, putative (ACA13) | chr3:8116335-8119388 REVERSE	2.27
signalling.G-proteins	at4g01860.1	transducin family protein / WD-40 repeat family protein | chr4:801345-808060 REVERSE	-2961
signalling.G-proteins	at3g55020.1	RabGAP/TBC domain-containing protein | chr3:20388869-20394911 REVERSE	-1647
signalling.G-proteins	at4g07410.1	transducin family protein / WD-40 repeat family protein | chr4:4201249-4205224 REVERSE	-1636
signalling.G-proteins	at1g01960.1	Symbols: EDA10 | EDA10 (embryo sac development arrest 10); ARF guanyl-nucleotide exchange factor/ binding / guanyl-nucleotide exchange factor | chr1:330588-337582 REVERSE	-1587
signalling.G-proteins	at5g18570.1	GTP1/OBG family protein | chr5:6171661-6174833 REVERSE	-1469
signalling.G-proteins	at5g13300.1	Symbols: SFC, VAN3, AGD3 | SFC (SCARFACE); ARF GTPase activator/ phosphoinositide binding | chr5:4255601-4262314 REVERSE	-1336
signalling.G-proteins	at5g08650.1	GTP-binding protein LepA, putative | chr5:2806323-2813264 REVERSE	-1204
signalling.G-proteins	at5g03530.1	Symbols: ATRAB ALPHA, ATRAB, ATRAB18B, ATRABC2A, RABC2A | RABC2A (RAB GTPASE HOMOLOG C2A); GTP binding / GTP-dependent protein binding / myosin XI tail binding | chr5:885522-887390 REVERSE	-1131
signalling.G-proteins	at3g12080.1	Symbols: emb2738 | emb2738 (embryo defective 2738); GTP binding | chr3:3847792-3852138 FORWARD	-1116
signalling.G-proteins	at5g46070.1	GTP binding / GTPase | chr5:18683364-18688707 FORWARD	-1086
signalling.G-proteins	at4g25540.1	Symbols: MSH3, ATMSH3 | MSH3 (Arabidopsis homolog of DNA mismatch repair protein MSH3); damaged DNA binding / mismatched DNA binding / protein binding | chr4:13042557-13048213 REVERSE	-1037
signalling.G-proteins	at1g03160.1	Symbols: FZL | FZL (FZO-LIKE); GTP binding / GTPase/ thiamin-phosphate diphosphorylase | chr1:761282-766153 FORWARD	-1006
signalling.G-proteins	at1g48270.1	Symbols: GCR1 | GCR1 (G-PROTEIN-COUPLED RECEPTOR 1); G-protein coupled receptor | chr1:17827953-17830420 REVERSE	1024
signalling.G-proteins	at3g54840.1	Symbols: ARA6, ATRABF1, ARA-6, ATRAB5C | ARA6; GTP binding / GTPase | chr3:20318412-20321001 FORWARD	1034
signalling.G-proteins	at3g46830.1	Symbols: ATRAB11A, ATRABA2C, ATRAB-A2C, RAB-A2C | ATRABA2C (ARABIDOPSIS RAB GTPASE HOMOLOG A2C); GTP binding | chr3:17246344-17248713 REVERSE	1036
signalling.G-proteins	at5g61530.1	small G protein family protein / RhoGAP family protein | chr5:24742048-24744784 FORWARD	1051
signalling.G-proteins	at5g10260.1	Symbols: AtRABH1e | AtRABH1e (Arabidopsis Rab GTPase homolog H1e); GTP binding | chr5:3219991-3221515 FORWARD	1086
signalling.G-proteins	at2g23460.1	Symbols: XLG1, ATXLG1 | XLG1 (EXTRA-LARGE G-PROTEIN 1); guanyl nucleotide binding / signal transducer | chr2:9995478-9999122 FORWARD	1107
signalling.G-proteins	at5g05987.1	Symbols: PRA1.A2 | PRA1.A2 (PRENYLATED RAB ACCEPTOR 1.A2) | chr5:1804804-1806850 FORWARD	1124
signalling.G-proteins	at1g31930.1	Symbols: XLG3 | XLG3 (extra-large GTP-binding protein 3); guanyl nucleotide binding / signal transducer | chr1:11465049-11469165 FORWARD	1223
signalling.G-proteins	at4g17530.1	Symbols: RAB1C, ATRAB1C, ATRABD2C | ATRAB1C; GTP binding | chr4:9773548-9775607 REVERSE	1329
signalling.G-proteins	at2g44610.1	Symbols: RAB6, ATRABH1B, ATRAB6A, RAB6A | RAB6A; GTP binding / protein binding | chr2:18411426-18414081 REVERSE	1355
signalling.G-proteins	at5g60860.1	Symbols: AtRABA1f | AtRABA1f (Arabidopsis Rab GTPase homolog A1f); GTP binding | chr5:24484622-24485705 FORWARD	1545
signalling.G-proteins	at4g17170.1	Symbols: AT-RAB2, ATRABB1C, ATRAB2A, RAB2A, RABB1C, ATRAB-B1B, RAB-B1B | RABB1C (ARABIDOPSIS RAB GTPASE HOMOLOG B1C); GTP binding / GTPase | chr4:9644713-9646366 REVERSE	1552
signalling.G-proteins	at1g02130.1	Symbols: ATRAB1B, ARA5, ARA-5, ATRABD2A, RABD2A | ARA-5 (ARABIDOPSIS RAS 5); GTP binding | chr1:400035-401882 REVERSE	1599
signalling.G-proteins	at5g45130.1	Symbols: ATRAB5A, ATRABF2A, RABF2A, RAB5A, RHA1, ATRAB-F2A, RAB-F2A | RHA1 (RAB HOMOLOG 1); GTP binding | chr5:18244266-18246450 FORWARD	1706
signalling.G-proteins	at4g19640.1	Symbols: ARA7, ARA-7, ATRABF2B, ATRAB5B, RABF2B, ATRAB-F2B, RAB-F2B | ARA7; GTP binding | chr4:10687198-10689617 REVERSE	1712
signalling.G-proteins	at5g05940.1	Symbols: ATROPGEF5, ROPGEF5 | ROPGEF5 (ROP GUANINE NUCLEOTIDE EXCHANGE FACTOR 5); Rho guanyl-nucleotide exchange factor | chr5:1785927-1788436 FORWARD	2119
signalling.G-proteins	at4g18800.1	Symbols: ATHSGBP, ATRAB11B, ATRABA1D | ATRABA1D (ARABIDOPSIS RAB GTPASE HOMOLOG A1D); GTP binding | chr4:10319862-10321551 REVERSE	2279
signalling.G-proteins	at4g35750.1	Rho-GTPase-activating protein-related | chr4:16940507-16941862 REVERSE	2386
signalling.G-proteins	at5g09550.1	RAB GDP-dissociation inhibitor | chr5:2963777-2966727 FORWARD	-1.25
signalling.G-proteins	at4g02080.1	Symbols: ASAR1, ATSARA1C, ATSAR2 | ATSAR2 (ARABIDOPSIS THALIANA SECRETION-ASSOCIATED RAS SUPER FAMILY 2); GTP binding | chr4:921454-922777 FORWARD	1.44
signalling.G-proteins	at5g54840.1	Symbols: ATSGP1, SGP1 | SGP1; GTP binding | chr5:22276513-22278423 REVERSE	1.58
signalling.in sugar and nutrient physiology	at4g08950.1	Symbols: EXO | EXO (EXORDIUM) | chr4:5740297-5741524 FORWARD	-2499
signalling.in sugar and nutrient physiology	at1g05200.1	Symbols: ATGLR3.4, GLR3.4, GLUR3 | ATGLR3.4; intracellular ligand-gated ion channel | chr1:1505317-1509152 FORWARD	-1824
signalling.in sugar and nutrient physiology	at4g16360.3	AMP-activated protein kinase | chr4:9245199-9247251 FORWARD	-1625
signalling.in sugar and nutrient physiology	at2g29120.1	Symbols: ATGLR2.7, GLR2.7 | ATGLR2.7; intracellular ligand-gated ion channel | chr2:12511292-12515895 REVERSE	2343
signalling.in sugar and nutrient physiology	at2g29110.1	Symbols: ATGLR2.8, GLR2.8 | ATGLR2.8; intracellular ligand-gated ion channel | chr2:12506880-12510552 REVERSE	2577
signalling.in sugar and nutrient physiology	at3g01090.2	Symbols: AKIN10, KIN10 | AKIN10 (Arabidopsis SNF1 kinase homolog 10); protein binding / protein kinase | chr3:31181-34487 REVERSE	4092
signalling.in sugar and nutrient physiology	at2g29100.1	Symbols: ATGLR2.9, GLR2.9 | ATGLR2.9; intracellular ligand-gated ion channel | chr2:12501092-12504912 REVERSE	4265
signalling.in sugar and nutrient physiology	at3g54040.1	photoassimilate-responsive protein-related | chr3:20013761-20015437 REVERSE	5773
signalling.in sugar and nutrient physiology	at5g52390.1	photoassimilate-responsive protein, putative | chr5:21263936-21265264 REVERSE	6612
signalling.in sugar and nutrient physiology	at5g64260.1	Symbols: EXL2 | EXL2 (EXORDIUM LIKE 2) | chr5:25703929-25705316 FORWARD	-1.41
signalling.light	at1g09530.1	Symbols: PIF3, POC1, PAP3 | PIF3 (PHYTOCHROME INTERACTING FACTOR 3); DNA binding / protein binding / transcription factor/ transcription regulator | chr1:3076582-3079539 FORWARD	-3792
signalling.light	at1g67310.1	calmodulin binding / transcription regulator | chr1:25198182-25203126 REVERSE	-2003
signalling.light	at1g53090.1	Symbols: SPA4 | SPA4 (SPA1-RELATED 4); protein binding / signal transducer | chr1:19783542-19786902 FORWARD	-1884
signalling.light	at3g45780.1	Symbols: PHOT1, NPH1, JK224, RPT1 | PHOT1 (PHOTOTROPIN 1); FMN binding / blue light photoreceptor/ kinase/ protein binding / protein serine/threonine kinase | chr3:16816866-16824210 FORWARD	-1595
signalling.light	at4g11110.1	Symbols: SPA2 | SPA2 (SPA1-RELATED 2); protein binding / signal transducer | chr4:6771605-6777225 FORWARD	-1474
signalling.light	at4g38180.1	Symbols: FRS5 | FRS5 (FAR1-related sequence 5); zinc ion binding | chr4:17906514-17909677 REVERSE	-1293
signalling.light	at3g15354.1	Symbols: SPA3 | SPA3 (SPA1-RELATED 3); protein binding / signal transducer | chr3:5169095-5172837 REVERSE	-1214
signalling.light	at3g22380.2	Symbols: TIC | TIC (TIME FOR COFFEE) | chr3:7912905-7919510 FORWARD	-1142
signalling.light	at3g18890.1	binding / catalytic/ coenzyme binding | chr3:6511023-6514994 FORWARD	-1073
signalling.light	at3g55850.2	Symbols: LAF3, LAF3 ISF1 | LAF3 (LONG AFTER FAR-RED 3); hydrolase/ hydrolase, acting on carbon-nitrogen (but not peptide) bonds | chr3:20721720-20725893 REVERSE	-1056
signalling.light	at1g30440.1	phototropic-responsive NPH3 family protein | chr1:10759475-10762394 FORWARD	-1012
signalling.light	at3g26740.1	Symbols: CCL | CCL (CCR-LIKE) | chr3:9827801-9828680 FORWARD	1162
signalling.light	at5g67385.1	protein binding / signal transducer | chr5:26884664-26887204 FORWARD	1173
signalling.light	at2g30520.1	Symbols: RPT2 | RPT2 (ROOT PHOTOTROPISM 2); protein binding | chr2:13002742-13005600 REVERSE	1394
signalling.light	at2g02710.1	Symbols: PLP, PLPB | PLPB (PAS/LOV PROTEIN B); signal transducer/ two-component sensor | chr2:758693-760871 REVERSE	1465
signalling.light	at3g07500.1	far-red impaired responsive family protein / FAR1 family protein | chr3:2392287-2393778 FORWARD	-1.35
signalling.light	at2g14820.1	Symbols: NPY2 | NPY2 (NAKED PINS IN YUC MUTANTS 2); protein binding / signal transducer | chr2:6358864-6361300 FORWARD	-1.69
signalling.light.COP9 signalosome	at5g43310.1	COP1-interacting protein-related | chr5:17379591-17385387 REVERSE	-2365
signalling.light.COP9 signalosome	at1g02090.1	Symbols: FUS5, CSN7, COP15, ATCSN7 | FUS5 (FUSCA 5); MAP kinase kinase | chr1:387277-389647 REVERSE	1061
signalling.light.COP9 signalosome	at4g14110.1	Symbols: COP9, CSN8, FUS7, EMB143 | COP9 (CONSTITUTIVE PHOTOMORPHOGENIC 9); metalloendopeptidase/ protein binding | chr4:8132886-8134920 REVERSE	1087
signalling.lipids	at1g60490.1	Symbols: ATVPS34, VPS34 | ATVPS34; 1-phosphatidylinositol-3-kinase/ binding / inositol or phosphatidylinositol kinase/ phosphotransferase, alcohol group as acceptor | chr1:22285572-22290315 REVERSE	-1188
signalling.MAP kinases	at1g63700.1	Symbols: YDA, MAPKKK4 | YDA (YODA); ATP binding / kinase/ protein kinase/ protein serine/threonine kinase | chr1:23624666-23629112 REVERSE	-1673
signalling.MAP kinases	at5g66850.1	Symbols: MAPKKK5 | MAPKKK5; ATP binding / kinase/ protein kinase/ protein serine/threonine kinase | chr5:26695607-26699324 REVERSE	-1043
signalling.MAP kinases	at4g23050.2	protein kinase, putative | chr4:12080060-12084256 FORWARD	1335
signalling.MAP kinases	at3g18040.1	Symbols: MPK9 | MPK9 (MAP KINASE 9); MAP kinase | chr3:6174719-6178465 FORWARD	1338
signalling.MAP kinases	at2g43790.1	Symbols: ATMPK6, MPK6, MAPK6 | ATMPK6 (ARABIDOPSIS THALIANA MAP KINASE 6); MAP kinase/ kinase | chr2:18138307-18140988 FORWARD	1442
signalling.MAP kinases	at5g67130.1	phospholipase C/ phosphoric diester hydrolase | chr5:26791346-26793882 FORWARD	1608
signalling.MAP kinases	at1g49740.1	phospholipase C/ phosphoric diester hydrolase | chr1:18407518-18410022 FORWARD	1894
signalling.MAP kinases	at3g51630.1	Symbols: WNK5, ZIK1, ATWNK5 | WNK5 (WITH NO LYSINE (K) KINASE 5); protein kinase | chr3:19148907-19152193 FORWARD	1.5
signalling.phosphinositides	at4g36080.1	FAT domain-containing protein / phosphatidylinositol 3- and 4-kinase family protein | chr4:17059824-17077628 REVERSE	-1913
signalling.phosphinositides	at1g49340.2	Symbols: ATPI4K ALPHA | ATPI4K ALPHA; 1-phosphatidylinositol 4-kinase/ inositol or phosphatidylinositol kinase | chr1:18252355-18264462 FORWARD	-1815
signalling.phosphinositides	at3g59770.3	Symbols: SAC9 | SAC9; inositol or phosphatidylinositol phosphatase | chr3:22079033-22086149 REVERSE	1072
signalling.phosphinositides	at4g20260.4	Symbols: ATPCAP1, PCAP1 | DREPP plasma membrane polypeptide family protein | chr4:10940739-10943502 FORWARD	1423
signalling.phosphinositides	at1g64460.1	phosphatidylinositol 3- and 4-kinase family protein | chr1:23943499-23944680 REVERSE	1768
signalling.phosphinositides	at2g17930.1	binding / inositol or phosphatidylinositol kinase/ phosphotransferase, alcohol group as acceptor | chr2:7784288-7802230 REVERSE	-2.89
signalling.phosphinositides.phosphatidylinositol 4-kinase	at5g64070.1	Symbols: PI-4KBETA1, PI4KBETA1 | PI-4KBETA1 (PHOSPHATIDYLINOSITOL 4-OH KINASE BETA1); 1-phosphatidylinositol 4-kinase | chr5:25636976-25644446 REVERSE	-1.53
signalling.phosphinositides.phosphatidylinositol-4-phosphate 5-kinase	at1g77740.1	1-phosphatidylinositol-4-phosphate 5-kinase, putative / PIP kinase, putative / PtdIns(4)P-5-kinase, putative / diphosphoinositide kinase, putative | chr1:29220538-29224220 FORWARD	-1305
signalling.phosphinositides.phosphatidylinositol-4-phosphate 5-kinase	at3g14270.1	phosphatidylinositol-4-phosphate 5-kinase family protein | chr3:4753925-4761456 FORWARD	-1.88
signalling.receptor kinases	at4g35470.1	leucine-rich repeat family protein | chr4:16846301-16849150 FORWARD	3354
signalling.receptor kinases.Catharanthus roseus-like RLK1	at5g54380.1	Symbols: THE1 | THE1 (THESEUS1); kinase/ protein kinase | chr5:22077092-22079880 REVERSE	-2412
signalling.receptor kinases.Catharanthus roseus-like RLK1	at1g30570.1	protein kinase family protein | chr1:10828933-10831482 FORWARD	-2286
signalling.receptor kinases.Catharanthus roseus-like RLK1	at5g24010.1	protein kinase family protein | chr5:8113795-8116615 FORWARD	-1964
signalling.receptor kinases.Catharanthus roseus-like RLK1	at3g51550.1	Symbols: FER | FER (FERONIA); kinase/ protein kinase | chr3:19117584-19120881 REVERSE	-1553
signalling.receptor kinases.crinkly like	at3g51990.1	protein kinase family protein | chr3:19287878-19289330 FORWARD	1305
signalling.receptor kinases.DUF 26	at4g21410.1	protein kinase family protein | chr4:11402314-11405056 REVERSE	-1859
signalling.receptor kinases.DUF 26	at4g05200.1	protein kinase family protein | chr4:2679723-2682309 REVERSE	1576
signalling.receptor kinases.DUF 26	at1g70530.1	protein kinase family protein | chr1:26588750-26591379 REVERSE	1598
signalling.receptor kinases.DUF 26	at4g23180.1	Symbols: CRK10, RLK4 | CRK10 (CYSTEINE-RICH RLK10); ATP binding / kinase/ protein kinase/ protein serine/threonine kinase/ protein tyrosine kinase | chr4:12138137-12140921 FORWARD	2368
signalling.receptor kinases.DUF 26	at4g23160.1	protein kinase family protein | chr4:12129485-12134187 FORWARD	2549
signalling.receptor kinases.DUF 26	at4g23190.1	Symbols: CRK11, AT-RLK3 | CRK11 (CYSTEINE-RICH RLK11); kinase/ protein kinase | chr4:12141032-12143833 REVERSE	1.05
signalling.receptor kinases.extensin	at3g58690.1	protein kinase family protein | chr3:21709170-21711381 FORWARD	-2463
signalling.receptor kinases.extensin	at5g56890.1	protein kinase family protein | chr5:23010523-23015671 REVERSE	-1471
signalling.receptor kinases.legume-lectin	at5g10530.1	lectin protein kinase, putative | chr5:3324978-3326933 REVERSE	-2301
signalling.receptor kinases.leucine rich repeat I	at2g37050.3	kinase | chr2:15568986-15573726 FORWARD	-2612
signalling.receptor kinases.leucine rich repeat I	at5g54590.2	protein kinase family protein | chr5:22180480-22182698 FORWARD	1228
signalling.receptor kinases.leucine rich repeat II	at5g16000.1	Symbols: NIK1 | NIK1 (NSP-INTERACTING KINASE 1); kinase | chr5:5224143-5227288 FORWARD	-2112
signalling.receptor kinases.leucine rich repeat II	at1g60800.1	Symbols: NIK3 | NIK3 (NSP-INTERACTING KINASE 3); kinase | chr1:22383453-22387457 REVERSE	-1311
signalling.receptor kinases.leucine rich repeat II	at5g10290.1	leucine-rich repeat family protein / protein kinase family protein | chr5:3235295-3238719 REVERSE	-1033
signalling.receptor kinases.leucine rich repeat II	at1g71830.1	Symbols: SERK1, ATSERK1 | SERK1 (SOMATIC EMBRYOGENESIS RECEPTOR-LIKE KINASE 1); kinase/ transmembrane receptor protein serine/threonine kinase | chr1:27018158-27022117 FORWARD	1682
signalling.receptor kinases.leucine rich repeat III	at4g20940.1	leucine-rich repeat family protein | chr4:11202728-11206280 FORWARD	-2116
signalling.receptor kinases.leucine rich repeat III	at3g17840.1	Symbols: RLK902 | RLK902; ATP binding / kinase/ protein serine/threonine kinase | chr3:6106028-6108675 FORWARD	-1761
signalling.receptor kinases.leucine rich repeat III	at5g58300.1	leucine-rich repeat transmembrane protein kinase, putative | chr5:23571879-23575084 FORWARD	-1645
signalling.receptor kinases.leucine rich repeat III	at2g26730.1	leucine-rich repeat transmembrane protein kinase, putative | chr2:11388407-11391641 FORWARD	-1634
signalling.receptor kinases.leucine rich repeat III	at5g10020.1	leucine-rich repeat transmembrane protein kinase, putative | chr5:3133261-3137242 FORWARD	-1.97
signalling.receptor kinases.leucine rich repeat V	at4g03390.1	Symbols: SRF3 | SRF3 (STRUBBELIG-RECEPTOR FAMILY 3); ATP binding / kinase/ protein serine/threonine kinase | chr4:1490465-1495103 REVERSE	-2348
signalling.receptor kinases.leucine rich repeat VI	at3g03770.1	leucine-rich repeat transmembrane protein kinase, putative | chr3:945135-949038 REVERSE	-1627
signalling.receptor kinases.leucine rich repeat VII	at1g12460.1	leucine-rich repeat transmembrane protein kinase, putative | chr1:4247249-4250630 FORWARD	-1602
signalling.receptor kinases.leucine rich repeat VIII.VIII-1	at1g79620.1	leucine-rich repeat transmembrane protein kinase, putative | chr1:29957562-29962305 REVERSE	-2464
signalling.receptor kinases.leucine rich repeat VIII.VIII-1	at1g06840.1	leucine-rich repeat transmembrane protein kinase, putative | chr1:2097747-2103479 REVERSE	2.03
signalling.receptor kinases.leucine rich repeat VIII.VIII-2	at1g53440.1	leucine-rich repeat family protein / protein kinase family protein | chr1:19945959-19951562 FORWARD	-3855
signalling.receptor kinases.leucine rich repeat VIII.VIII-2	at1g56140.1	leucine-rich repeat family protein / protein kinase family protein | chr1:21001574-21007809 REVERSE	-1793
signalling.receptor kinases.leucine rich repeat VIII.VIII-2	at1g56120.1	kinase | chr1:20987288-20993072 REVERSE	2159
signalling.receptor kinases.leucine rich repeat X	at2g41820.1	leucine-rich repeat transmembrane protein kinase, putative | chr2:17446744-17450071 FORWARD	-2081
signalling.receptor kinases.leucine rich repeat X	at1g72300.1	leucine-rich repeat transmembrane protein kinase, putative | chr1:27217477-27221123 REVERSE	3289
signalling.receptor kinases.leucine rich repeat XI	at5g65700.1	Symbols: BAM1 | BAM1 (BARELY ANY MERISTEM 1); ATP binding / kinase/ protein serine/threonine kinase | chr5:26281757-26285247 FORWARD	-2991
signalling.receptor kinases.leucine rich repeat XI	at5g63930.1	leucine-rich repeat transmembrane protein kinase, putative | chr5:25583006-25586499 FORWARD	-2235
signalling.receptor kinases.leucine rich repeat XI	at1g28440.1	Symbols: HSL1 | HSL1 (HAESA-Like 1); ATP binding / kinase/ protein serine/threonine kinase | chr1:9996824-10000447 FORWARD	-1609
signalling.receptor kinases.leucine rich repeat XI	at5g61480.1	leucine-rich repeat transmembrane protein kinase, putative | chr5:24724541-24727842 REVERSE	-1576
signalling.receptor kinases.leucine rich repeat XI	at2g31880.1	leucine-rich repeat transmembrane protein kinase, putative | chr2:13554894-13556977 FORWARD	-1321
signalling.receptor kinases.leucine rich repeat XI	at1g75820.1	Symbols: CLV1, FAS3, FLO5 | CLV1 (CLAVATA 1); ATP binding / kinase/ protein serine/threonine kinase/ receptor signaling protein serine/threonine kinase | chr1:28463462-28466971 REVERSE	-1273
signalling.receptor kinases.leucine rich repeat XI	at5g25930.1	leucine-rich repeat family protein / protein kinase family protein | chr5:9050794-9054143 FORWARD	2436
signalling.receptor kinases.leucine rich repeat XI	at1g17230.1	ATP binding / protein binding / protein kinase/ protein serine/threonine kinase/ protein tyrosine kinase | chr1:5891324-5895075 FORWARD	-2.28
signalling.receptor kinases.leucine rich repeat XII	at1g35710.1	leucine-rich repeat transmembrane protein kinase, putative | chr1:13220940-13224681 FORWARD	-2882
signalling.receptor kinases.leucine rich repeat XII	at4g08850.1	kinase | chr4:5636489-5640636 REVERSE	-2308
signalling.receptor kinases.leucine rich repeat XII	at3g47090.1	leucine-rich repeat transmembrane protein kinase, putative | chr3:17341512-17344645 REVERSE	-1701
signalling.receptor kinases.leucine rich repeat XII	at3g47570.1	leucine-rich repeat transmembrane protein kinase, putative | chr3:17527507-17530929 FORWARD	-1073
signalling.receptor kinases.leucine rich repeat XII	at3g47110.1	leucine-rich repeat transmembrane protein kinase, putative | chr3:17347103-17350296 REVERSE	1957
signalling.receptor kinases.leucine rich repeat XII	at5g20480.1	Symbols: EFR | EFR (EF-TU RECEPTOR); ATP binding / kinase/ protein serine/threonine kinase | chr5:6922480-6925887 FORWARD	-2.5
signalling.receptor kinases.leucine rich repeat XIII	at1g31420.1	Symbols: FEI1 | FEI1 (FEI 1); ATP binding / kinase/ protein serine/threonine kinase | chr1:11249618-11253879 FORWARD	-1382
signalling.receptor kinases.leucine rich repeat XIV	at2g16250.1	leucine-rich repeat transmembrane protein kinase, putative | chr2:7039682-7042933 REVERSE	-1.24
signalling.receptor kinases.lysine motif	at1g51940.1	protein kinase family protein / peptidoglycan-binding LysM domain-containing protein | chr1:19295904-19299118 REVERSE	-1695
signalling.receptor kinases.misc	at3g02130.1	Symbols: RPK2, TOAD2 | RPK2 (RECEPTOR-LIKE PROTEIN KINASE 2); ATP binding / kinase/ protein serine/threonine kinase | chr3:381219-384442 FORWARD	-1892
signalling.receptor kinases.misc	at1g07390.3	Symbols: AtRLP1 | protein binding | chr1:2269893-2274820 FORWARD	-1774
signalling.receptor kinases.misc	at5g59260.1	lectin protein kinase, putative | chr5:23907901-23909925 REVERSE	-1486
signalling.receptor kinases.misc	at1g67720.1	leucine-rich repeat family protein / protein kinase family protein | chr1:25386341-25391073 FORWARD	-1108
signalling.receptor kinases.misc	at1g67840.1	Symbols: CSK | CSK (CHLOROPLAST SENSOR KINASE); ATP binding / kinase | chr1:25434102-25437075 FORWARD	-1101
signalling.receptor kinases.misc	at3g22060.1	receptor protein kinase-related | chr3:7771016-7772340 FORWARD	1398
signalling.receptor kinases.misc	at2g37710.1	Symbols: RLK | RLK (receptor lectin kinase); kinase | chr2:15814718-15817004 REVERSE	2405
signalling.receptor kinases.proline extensin like	at3g13690.1	protein kinase family protein | chr3:4485735-4490231 FORWARD	-1507
signalling.receptor kinases.proline extensin like	at3g24550.1	Symbols: ATPERK1 | ATPERK1 (PROLINE EXTENSIN-LIKE RECEPTOR KINASE 1); ATP binding / protein kinase | chr3:8960258-8963568 FORWARD	-1.64
signalling.receptor kinases.RKF3 like	at1g11050.1	protein kinase family protein | chr1:3681888-3684169 FORWARD	1159
signalling.receptor kinases.S-locus glycoprotein like	at1g34300.1	lectin protein kinase family protein | chr1:12503406-12506048 FORWARD	-2672
signalling.receptor kinases.S-locus glycoprotein like	at4g21380.1	Symbols: ARK3 | ARK3 (A. THALIANA RECEPTOR KINASE 3); kinase/ transmembrane receptor protein serine/threonine kinase | chr4:11388925-11393226 REVERSE	-2302
signalling.receptor kinases.S-locus glycoprotein like	at4g21390.1	Symbols: B120 | B120; ATP binding / protein kinase/ protein serine/threonine kinase/ sugar binding | chr4:11394355-11397583 REVERSE	-1085
signalling.receptor kinases.S-locus glycoprotein like	at5g24080.1	protein kinase family protein | chr5:8139253-8141122 REVERSE	2465
signalling.receptor kinases.S-locus glycoprotein like	at4g27290.1	ATP binding / protein kinase/ protein serine/threonine kinase/ protein tyrosine kinase/ sugar binding | chr4:13666281-13669202 FORWARD	6187
signalling.receptor kinases.wall associated kinase	at1g21270.1	Symbols: WAK2 | WAK2; ATP binding / calcium ion binding / protein kinase/ protein serine/threonine kinase | chr1:7444931-7447549 FORWARD	-1981
signalling.receptor kinases.wall associated kinase	at1g21230.1	Symbols: WAK5 | WAK5 (WALL ASSOCIATED KINASE 5); kinase/ protein serine/threonine kinase | chr1:7429980-7432346 FORWARD	-1708
signalling.receptor kinases.wall associated kinase	at2g23450.2	protein kinase family protein | chr2:9988754-9991695 REVERSE	4398
signalling.receptor kinases.wheat LRK10 like	at1g66880.1	serine/threonine protein kinase family protein | chr1:24946928-24955611 FORWARD	1329
signalling.receptor kinases.wheat LRK10 like	at1g18390.2	ATP binding / kinase/ protein kinase/ protein serine/threonine kinase/ protein tyrosine kinase | chr1:6327463-6330098 FORWARD	2689
signalling.receptor kinases.wheat LRK10 like	at1g67000.1	ATP binding / kinase/ protein kinase/ protein serine/threonine kinase | chr1:25004109-25007647 REVERSE	2691
signalling.unspecified	at4g24580.1	Symbols: REN1 | REN1 (ROP1 ENHANCER 1); Rho GTPase activator/ Rho GTPase binding / phosphoinositide binding | chr4:12687879-12694248 REVERSE	-1748
signalling.unspecified	at1g53470.1	Symbols: MSL4 | MSL4 (MECHANOSENSITIVE CHANNEL OF SMALL CONDUCTANCE-LIKE 4) | chr1:19958587-19961578 FORWARD	-1601
signalling.unspecified	at5g05850.1	leucine-rich repeat family protein | chr5:1762405-1764678 REVERSE	1106
signalling.unspecified	at5g05930.1	guanylyl cyclase-related (GC1) | chr5:1779974-1783412 REVERSE	1259
stress.abiotic	at1g16560.1	Per1-like family protein | chr1:5668413-5670708 FORWARD	1117
stress.abiotic	at2g24550.1	unknown protein | chr2:10427856-10429222 REVERSE	3088
stress.abiotic	at5g52060.1	Symbols: ATBAG1 | ATBAG1 (ARABIDOPSIS THALIANA BCL-2-ASSOCIATED ATHANOGENE 1); protein binding | chr5:21152214-21154244 REVERSE	3254
stress.abiotic	at4g11650.1	Symbols: ATOSM34 | ATOSM34 (osmotin 34) | chr4:7024856-7026146 REVERSE	7927
stress.abiotic.cold	at1g05260.1	Symbols: RCI3, RCI3A | RCI3 (RARE COLD INDUCIBLE GENE 3); peroxidase | chr1:1529767-1531439 FORWARD	-3704
stress.abiotic.cold	at3g17020.1	universal stress protein (USP) family protein | chr3:5802536-5804157 REVERSE	1511
stress.abiotic.cold	at3g53990.1	universal stress protein (USP) family protein | chr3:19989337-19991134 REVERSE	2182
stress.abiotic.drought/salt	at5g64030.1	dehydration-responsive protein-related | chr5:25624037-25628559 FORWARD	-2877
stress.abiotic.drought/salt	at4g19120.1	Symbols: ERD3 | ERD3 (early-responsive to dehydration 3) | chr4:10460295-10464174 REVERSE	-2388
stress.abiotic.drought/salt	at1g30360.1	Symbols: ERD4 | ERD4 (early-responsive to dehydration 4) | chr1:10715665-10718997 FORWARD	-1815
stress.abiotic.drought/salt	at2g41430.1	Symbols: ERD15, LSR1, CID1 | ERD15 (EARLY RESPONSIVE TO DEHYDRATION 15); protein binding | chr2:17269440-17270542 FORWARD	1014
stress.abiotic.drought/salt	at1g26850.1	dehydration-responsive family protein | chr1:9300873-9304139 REVERSE	2155
stress.abiotic.drought/salt	at3g01100.1	Symbols: HYP1, ATHYP1 | HYP1 (HYPOTHETICAL PROTEIN 1) | chr3:34719-38529 REVERSE	-1.2
stress.abiotic.heat	at2g29970.1	heat shock protein-related | chr2:12776386-12779938 FORWARD	-1777
stress.abiotic.heat	at2g26150.1	Symbols: ATHSFA2, HSFA2 | ATHSFA2; DNA binding / transcription factor | chr2:11135682-11137396 FORWARD	-1757
stress.abiotic.heat	at3g07770.1	ATP binding | chr3:2479548-2484194 FORWARD	-1741
stress.abiotic.heat	at2g26890.1	Symbols: GRV2, KAM2 | GRV2 (GRAVITROPISM DEFECTIVE 2); binding / heat shock protein binding | chr2:11462067-11473841 REVERSE	-1639
stress.abiotic.heat	at4g37480.1	DNAJ heat shock N-terminal domain-containing protein | chr4:17619261-17621402 FORWARD	-1568
stress.abiotic.heat	at5g52640.1	Symbols: HSP81-1, ATHS83, HSP81.1, HSP83, ATHSP90.1 | ATHSP90.1 (HEAT SHOCK PROTEIN 90.1); ATP binding / unfolded protein binding | chr5:21352399-21355361 FORWARD	-1546
stress.abiotic.heat	at5g59720.1	Symbols: HSP18.2 | HSP18.2 (heat shock protein 18.2) | chr5:24062577-24063277 FORWARD	-1269
stress.abiotic.heat	at4g30350.1	heat shock protein-related | chr4:14847740-14851143 FORWARD	-1219
stress.abiotic.heat	at1g74310.1	Symbols: ATHSP101, HSP101, HOT1 | ATHSP101 (ARABIDOPSIS THALIANA HEAT SHOCK PROTEIN 101); ATP binding / ATPase/ nucleoside-triphosphatase/ nucleotide binding / protein binding | chr1:27936508-27940190 REVERSE	-1196
stress.abiotic.heat	at3g08910.1	DNAJ heat shock protein, putative | chr3:2710154-2711895 REVERSE	-1153
stress.abiotic.heat	at1g18700.4	DNAJ heat shock N-terminal domain-containing protein | chr1:6437531-6444076 FORWARD	-1091
stress.abiotic.heat	at5g25530.1	DNAJ heat shock protein, putative | chr5:8889665-8890954 REVERSE	1208
stress.abiotic.heat	at4g21870.1	26.5 kDa class P-related heat shock protein (HSP26.5-P) | chr4:11603568-11604331 REVERSE	1461
stress.abiotic.heat	at4g21320.1	Symbols: HSA32 | HSA32 (HEAT-STRESS-ASSOCIATED 32); catalytic | chr4:11340362-11341877 FORWARD	1761
stress.abiotic.heat	at1g11040.1	DNAJ chaperone C-terminal domain-containing protein | chr1:3679225-3680924 REVERSE	1848
stress.abiotic.heat	at4g36990.1	Symbols: HSF4, HSFB1, AT-HSFB1, ATHSF4 | HSF4 (HEAT SHOCK FACTOR 4); DNA binding / transcription factor/ transcription repressor | chr4:17440177-17442151 FORWARD	4.06
stress.abiotic.light	at4g05420.1	Symbols: DDB1A | DDB1A (DAMAGED DNA BINDING PROTEIN 1A); DNA binding / protein binding | chr4:2746121-2752943 FORWARD	-1.43
stress.abiotic.light	at1g32230.1	Symbols: RCD1, CEO, CEO1, ATP8 | RCD1 (RADICAL-INDUCED CELL DEATH1); protein binding | chr1:11612118-11616218 FORWARD	2.68
stress.abiotic.touch/wounding	at1g19670.1	Symbols: ATCLH1, CORI1, ATHCOR1 | ATCLH1 (ARABIDOPSIS THALIANA CORONATINE-INDUCED PROTEIN 1); chlorophyllase | chr1:6803611-6805044 REVERSE	-2821
stress.abiotic.touch/wounding	at4g02260.1	Symbols: RSH1, AT-RSH1, ATRSH1 | RSH1 (RELA-SPOT HOMOLOG 1); catalytic | chr4:985232-991494 FORWARD	-1045
stress.abiotic.unspecified	at5g20630.1	Symbols: GLP3, GLP3A, GLP3B, ATGER3, GER3 | GER3 (GERMIN 3); oxalate oxidase | chr5:6975104-6975993 REVERSE	-2429
stress.abiotic.unspecified	at3g51780.1	Symbols: ATBAG4 | ATBAG4 (ARABIDOPSIS THALIANA BCL-2-ASSOCIATED ATHANOGENE 4); protein binding | chr3:19206768-19208310 REVERSE	1307
stress.abiotic.unspecified	at1g68300.1	universal stress protein (USP) family protein | chr1:25598331-25599357 REVERSE	1683
stress.abiotic.unspecified	at2g47710.1	universal stress protein (USP) family protein | chr2:19554834-19556065 REVERSE	1759
stress.abiotic.unspecified	at5g15780.1	pollen Ole e 1 allergen and extensin family protein | chr5:5144727-5146403 REVERSE	2772
stress.abiotic.unspecified	at2g21620.2	Symbols: RD2 | RD2 | chr2:9248573-9250256 FORWARD	3134
stress.abiotic.unspecified	at5g57625.1	allergen V5/Tpx-1-related family protein | chr5:23337850-23338807 FORWARD	4561
